# Supplementary material
Source: PubMed Central journal article supplement (PMC3492501)
Supplement: NIHMS408116-supplement-1.pdf [file NIHMS408116-supplement-1.pdf]

## Supplementary Information

### Iterative plug-and-play methodology for constructing and modifying synthetic gene networks

Kevin D. Litcofsky<sup>1,\*</sup>, Raffi B. Afeyan<sup>1,\*</sup>, Russell J. Krom<sup>1</sup>,  
Ahmad S. Khalil<sup>1,§</sup> and James J. Collins<sup>1,2,§</sup>

<sup>1</sup>*Howard Hughes Medical Institute, Department of Biomedical Engineering, and Center for BioDynamics, Boston University, Boston, MA 02215, USA.*

<sup>2</sup>*Wyss Institute for Biologically Inspired Engineering, Harvard University, Boston, MA 02115, USA.*

*\*These authors contributed equally to this work.*

*§Co-senior authors.*

*Correspondence should be addressed to J.J. Collins (jcollins@bu.edu)*

|                               |                                                                               |
|-------------------------------|-------------------------------------------------------------------------------|
| <b>Supplementary Figure 1</b> | Input/output functions for optimized promoters                                |
| <b>Supplementary Figure 2</b> | Input/output functions for optimized transcription factors                    |
| <b>Supplementary Figure 3</b> | Input/output functions for optimized terminator and reporters                 |
| <b>Supplementary Figure 4</b> | aTc-induced switching and subsequent maintenance of the genetic toggle switch |
| <b>Supplementary Table 1</b>  | Restriction enzymes and recognition sites                                     |
| <b>Supplementary Table 2</b>  | Component library                                                             |
| <b>Supplementary Note</b>     | DNA sequence and annotation of optimized components and circuit constructs    |

Supplementary Figure 1. Input/output functions for optimized promoters.

# PROMOTERS

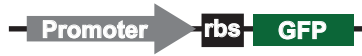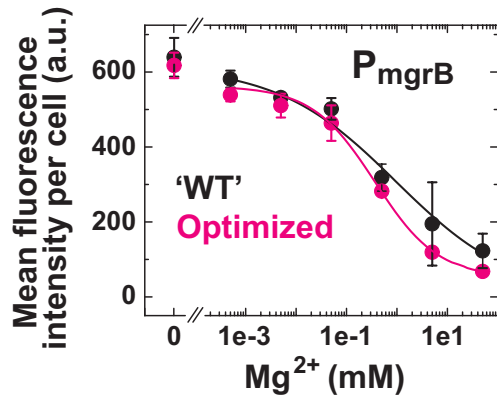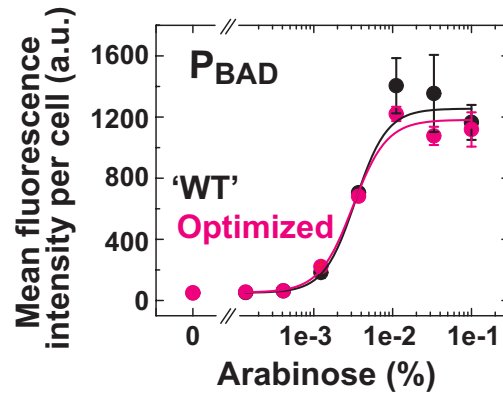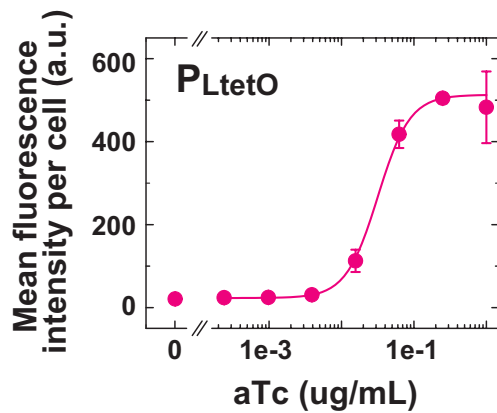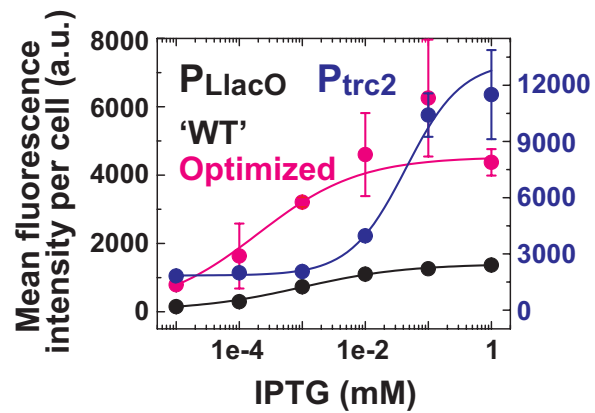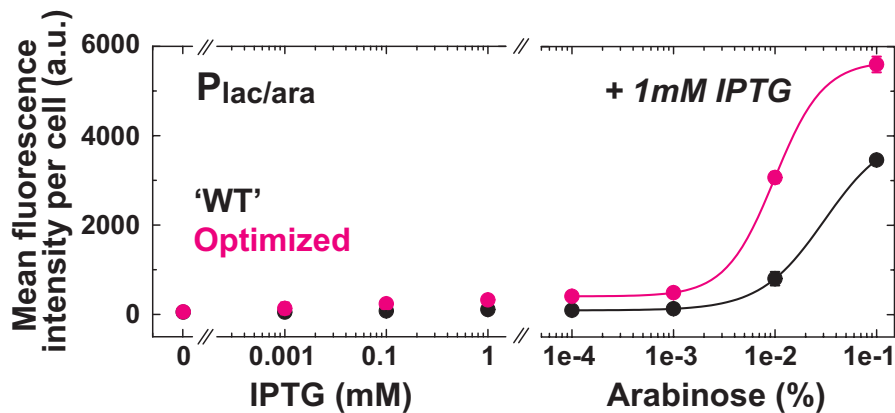

Cells were grown overnight in LB medium, then diluted 1:1000 into LB and induced for 5 hours prior to measurement. Fluorescence was measured via flow cytometry by collecting 10,000 events per replicate.  $P_{mgrB}$  was induced with 0–50 mM  $MgCl_2$ .  $P_{BAD}$  was induced with 0–0.01 % w/v arabinose.  $P_{LtetO}$  was induced with 0–1  $\mu g/ml$  aTc.  $P_{LlacO}$  and  $P_{trc2}$  were induced with 0–1 mM IPTG.  $P_{lac/ara}$  was induced with 0–1 mM IPTG (no arabinose) and with 0–0.01 % w/v arabinose (with 1 mM IPTG). Points represent mean values for three experiments  $\pm$  SD.  $n = 10,000$  events per experiment. Lines represent sigmoidal fits.

Supplementary Figure 2. Input/output functions for optimized transcription factors.

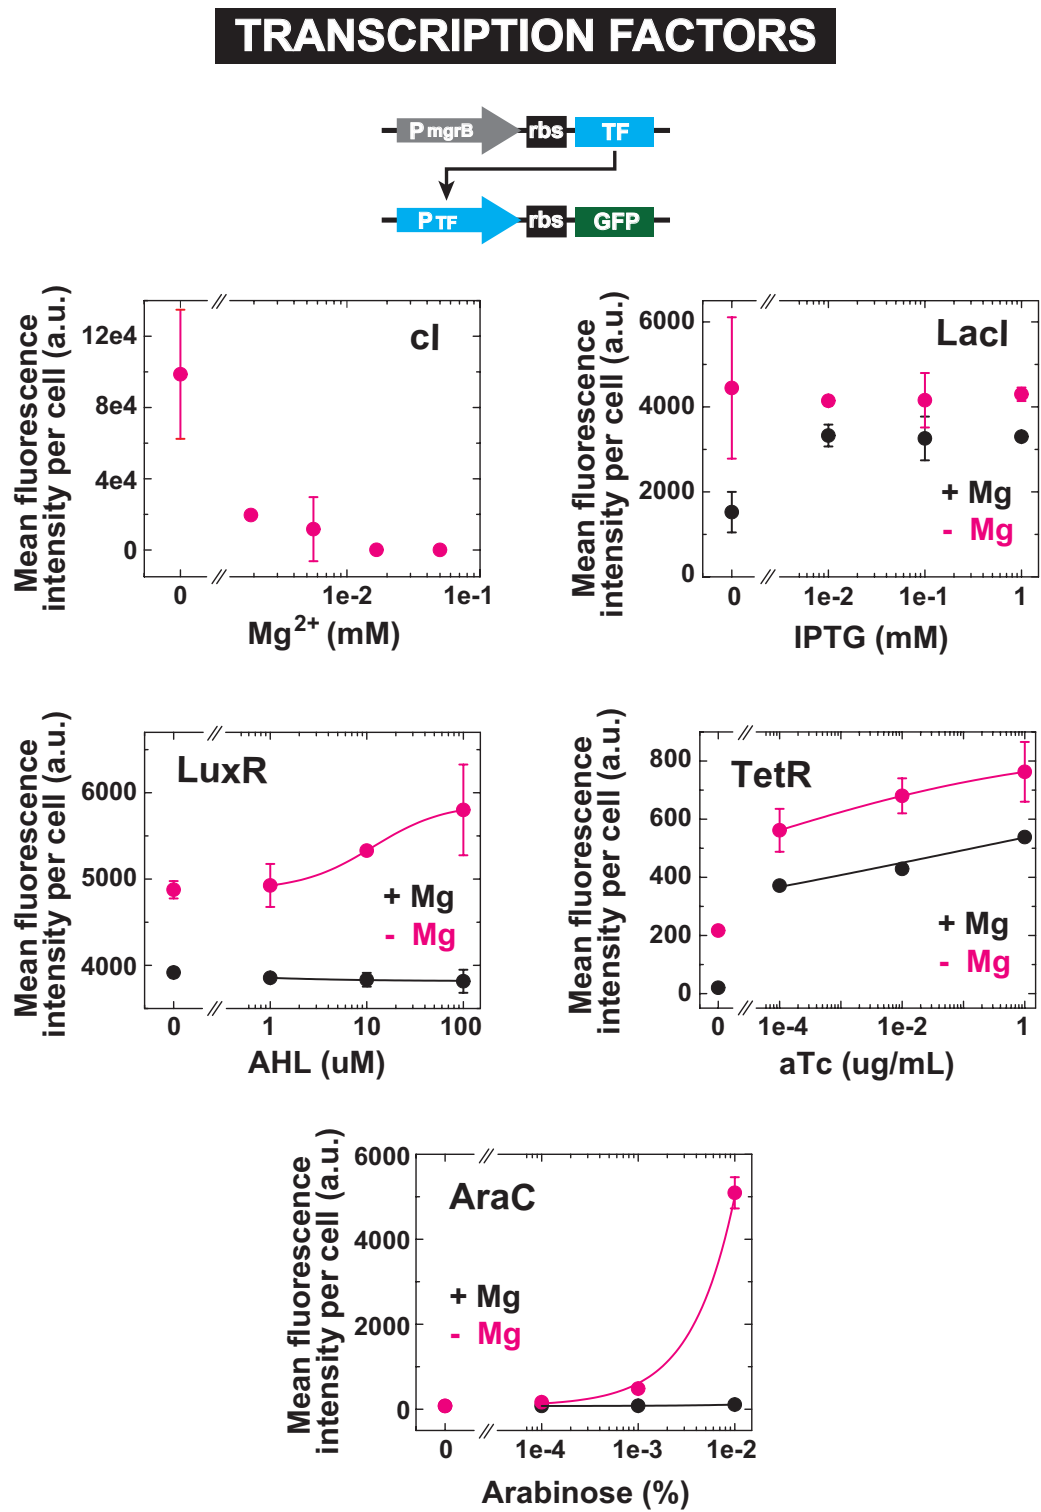

Cells were grown overnight in LB medium, then diluted 1:1000 into LB and induced for 8 hours prior to measurement. Fluorescence was measured via flow cytometry by collecting 10,000 events per replicate. All experiments were conducted without TF (black, 50 mM MgCl<sub>2</sub>) or with TF (red, 0 mM MgCl<sub>2</sub>), and dose responses were performed with the TF-specific inducer chemicals, except for cI (0–50 mM MgCl<sub>2</sub>). Induction conditions: LacI / P<sub>trc2</sub>, 0–1 mM IPTG; LuxR / P<sub>lux</sub>, 0–100 μM N-acyl homoserine lactone (AHL). TetR / P<sub>LtetO</sub>, 0–1 μg/ml aTc. AraC / P<sub>BAD</sub>, 0–0.01% w/v arabinose. Points represent mean values for three experiments ± SD. *n* = 10,000 events per experiment. Lines represent sigmoidal fits.

Supplementary Figure 3. Input/output functions for the optimized terminator and reporters.

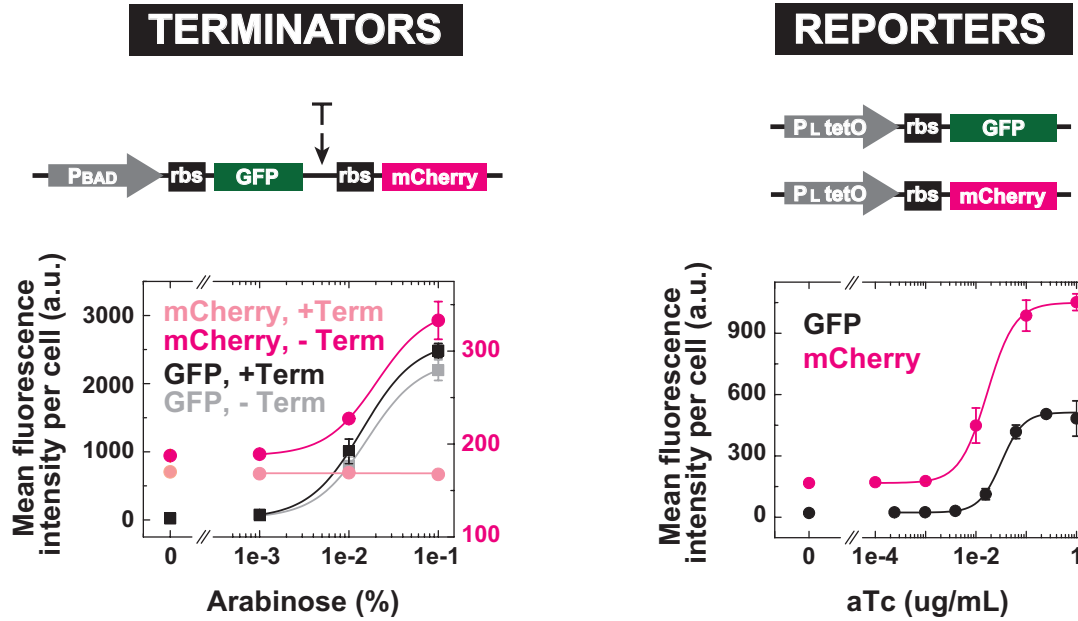

Cells were grown overnight in LB medium, then diluted 1:1000 into LB and induced for 8 hours prior to measurement. Fluorescence was measured via flow cytometry by collecting 10,000 events per replicate. The terminator was tested in a bicistronic reporter circuit, with or without a terminator between reporters. P<sub>BAD</sub> was induced with 0–0.01% w/v arabinose. Reporters were expressed with P<sub>LtetO</sub> (0–1 µg/ml aTc). Points represent mean values for three experiments ± SD.  $n = 10,000$  events per experiment. Lines represent sigmoidal fits.

**Supplementary Figure 4.** aTc-induced switching and subsequent maintenance of the genetic toggle switch.

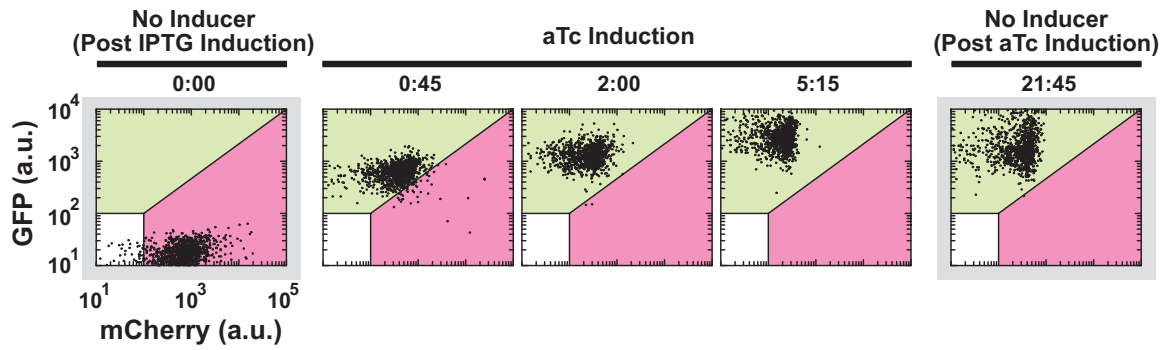

A time-course of cells harboring the toggle construct switching from the mCherry state (0 hrs) to the GFP state (0–5:15 hrs) through aTc induction, and then maintained in the GFP state when diluted into the no-inducer condition and grown overnight (21:45 hrs). Data were obtained by flow cytometry at the indicated times.



**Supplementary Table 1.** Restriction enzymes and recognition sites. The cleavage site within each recognition site is indicated by “|”.

| Enzyme     | Recognition Site |
|------------|------------------|
| AatII      | GACGT C          |
| AclI       | AA CGTT          |
| AflII      | C TTAAG          |
| ApaLI      | G TGCAC          |
| AvrII      | C CTAGG          |
| BamHI-HF   | G GATCC          |
| BsrGI      | T GTACA          |
| EagI-HF    | C GGCCG          |
| EcoRI-HF   | G AATTC          |
| EcoRV-HF   | GAT ATC          |
| HindIII-HF | A AGCTT          |
| KasI       | G GCGCC          |
| KpnI-HF    | GGTAC C          |
| MfeI-HF    | C AATTG          |
| MluI       | A CGCGT          |
| NcoI-HF    | C CATGG          |
| NdeI       | CA TATG          |
| NheI-HF    | G CTAGC          |
| PciI       | A CATGT          |
| PstI-HF    | CTGCA G          |
| PvuII-HF   | CAG CTG          |
| SacI-HF    | GAGCT C          |
| SacII      | CCGC GG          |
| SalI-HF    | G TCGAC          |
| ScaI-HF    | AGT ACT          |
| SpeI       | A CTAGT          |
| SphI-HF    | GCATG C          |
| SspI-HF    | AAT ATT          |
| XbaI       | T CTAGA          |
| XhoI       | C TCGAG          |
| XmaI       | C CCGGG          |

**Supplementary Table 2.** Component library. List of optimized components.

| Component         | Length(bp) | Library Plasmid | Type                        |
|-------------------|------------|-----------------|-----------------------------|
| LuxR              | 756        | pKLi049         | Gene (Activator)            |
| AraC_JK_LAA       | 879        | pKLi051         | Gene (Activator)            |
| ECFP-LAA          | 759        | pKLi015         | Gene (Fluorescent Reporter) |
| EYFP-LAA          | 759        | pKLi013         | Gene (Fluorescent Reporter) |
| GFPmut3b-LAA      | 756        | pKLi011         | Gene (Fluorescent Reporter) |
| mCherry-LAA       | 750        | pKLi037         | Gene (Fluorescent Reporter) |
| mCherry-LCOpt-LAA | 750        | pKLi056         | Gene (Fluorescent Reporter) |
| flpE-LAA          | 1305       | pKLi025         | Gene (Recombinase)          |
| cl-LAA            | 753        | pKLi021         | Gene (Repressor)            |
| lacI-LAA          | 1122       | pKLi017         | Gene (Repressor)            |
| tetR-LAA          | 663        | pKLi019         | Gene (Repressor)            |
| LuxI_RSR          | 618        | pKLi047         | Gene (Quorum Sensing)       |
| PBAD              | 286        | pKLi034         | Promoter                    |
| Plac/ara          | 483        | pKLi053         | Promoter                    |
| PLs1con           | 558        | pKLi031         | Promoter                    |
| PLtetO            | 74         | pKLi030         | Promoter                    |
| Plux              | 219        | pKLi055         | Promoter                    |
| Plux/cl           | 97         | pKLi048         | Promoter                    |
| PmgrB             | 543        | pKLi054         | Promoter                    |
| Ptrc2             | 75         | pKLi032         | Promoter                    |
| T0                | 123        | pKLi027         | Transcriptional Terminator  |
| T1T2              | 231        | pKLi028         | Transcriptional Terminator  |
| Spacer-50bp       | 50         | pKLi057         | Spacer                      |
| Spacer-100bp      | 100        | pKLi058         | Spacer                      |
| Spacer-250bp      | 250        | pKLi059         | Spacer                      |
| Spacer-500bp      | 500        | pKLi060         | Spacer                      |

## Supplementary Note

### DNA sequence and annotation of optimized components

LOCUS pKE1-MCS 2376 bp DNA CIRCULAR SYN  
DEFINITION Carbenicillin-Resistant, ColE1 ori, Optimized Vector  
ACCESSION pKE1-MCS  
FEATURES Location/Qualifiers  
misc\_feature 1..330  
/note="Multiple Cloning Site"  
terminator 331..435  
/note="T1"  
/product="transcriptional terminator from rrnB operon"  
misc\_feature 437..437  
/note="C->T AvrII"  
rep\_origin 442..1249  
/note="ColE1"  
/product="High Copy Origin of Replication"  
misc\_feature 839..839  
/note="G->C ApaI"  
misc\_feature 1250..1250  
/note="A->G SpeI"  
terminator 1256..1361  
/note="T0"  
/product="transcriptional terminator from phage lambda"  
terminator complement (1256..1361)  
/note="T0"  
misc\_feature complement (1367..2376)  
/note="AmpR"  
/phenotype="Ampicillin Resistance"  
CDS complement (1386..2246)  
/note="Beta-lactamase"  
misc\_feature 2273  
/note="Transcription Start"  
-10\_signal complement (2290..2295)  
/note="-10 Box"  
-35\_signal complement (2311..2316)  
/note="-35 Box"  
BASE COUNT 587 a 614 c 586 g 589 t  
ORIGIN  
1 gacgtctgtg caagtactac tgttctgcag tcacttgaat tcgataccca gctgggtgga  
61 gtgcaccaag gagcatgcga aggaaacggt tcgcagaagc ttccgcaagg taccactttg  
121 ccgcggagta tttgtacatt tgaaggatcc tcaagtcggc cgcccgttcc atggatactc  
181 gtcgaccatt acgctagccg tctggagctc ggactgctta agtcgctcca tatgctcggt  
241 cccgggacta cacaattgtc ccccggcgcc agggttgata tctatcgccc tagggaccgt  
301 ctcgagagaa tcaatattaa tccaacgcgt ggcatcaaat aaaacgaaag gctcagtcga  
361 aagactgggc ctttcgtttt atctgtttgt tgtcggtgaa cgctctcctg agtaggacaa  
421 atccgccgcc ctagacttag gcgttcggct gcggcgagcg gtatcagctc actcaaaggc  
481 ggtaatacgg ttatccacag aatcagggga taacgcagga aagaacatgt gagcaaaagg  
541 ccagcaaaaag gccaggaacc gtaaaaaggc cgcgttgctg gcgtttttcc ataggctccg  
601 cccccctgac gagcatcaca aaaatcgacg ctcaagtcag aggtggcgaa acccgacagg  
661 actataaaga taccaggcgt ttccccctgg aagctccctc gtgcgctctc ctgttccgac  
721 cctgccgctt accggatacc tgtccgcctt tctcccttcg ggaagcgtgg cgctttctca  
781 tagctcacgc tgtaggtatc tcagttcggg gtaggtcgtt cgctccaagc tgggctgtct

```

841 gcacgaacc cccgttcagc cggaccgctg cgccttatcc ggtaactatc gtcttgagtc
901 caaccgggta agacacgact tatcgccact ggcagcagcc actggtaaca ggattagcag
961 agcgaggatg taggcgggtg ctacagagtt cttgaagtgg tggcctaact acggctacac
1021 tagaaggaca gtatttggtg tctgcgctct gctgaagcca gttaccttcg gaaaaagagt
1081 tggtagctct tgatccggca aacaaaccac cgctggtagc ggtggttttt ttgtttgcaa
1141 gcagcagatt acgcgagaa aaaaaggatc tcaagaagat cctttgatct tttctacggg
1201 gtctgacgct cagtggaacg aaaactcacg ttaagggatt ttggtcatgg ctagtgcctg
1261 gattctcacc aataaaaaac gcccggcggc aaccgagcgt tctgaacaaa tccagatgga
1321 gttctgaggt cattactgga tctatcaaca ggagtccaag ccaattcgta aacttgggtct
1381 gacagttacc aatgcttaat cagtgaggca cctatctcag cgatctgtct atttcgttca
1441 tccatagtgt cctgactccc cgtcgtgtag ataactacga tacggggaggg cttaccatct
1501 ggccccagtg ctgcaatgat accgcgagac ccacgctcac cggctccaga tttatcagca
1561 ataaaccagc cagccggaag ggccgagcgc agaagtggtc ctgcaacttt atccgcctcc
1621 atccagtcta ttaattggtg ccgggaagct agagtaagta gttcgcaggt taatagtttg
1681 cgcagcgttg ttgccattgc tacaggcatc gtgggtgtcac gctcgtcgtt tggtagggct
1741 tcattcagct ccggttcca acgatcaagg cgagttacat gatcccccat gttgtgcaaa
1801 aaagcgggta gctccttcgg tcctccgatac gttgtcagaa gtaagttggc cgcagtggtt
1861 tcactcatgg ttatggcagc actgcataat tctcttactg tcatgccatc cgtaagatgc
1921 ttttctgtga ctggtgagta ttcaaccaag tcattctgag aatagtgtat gcggcgaccg
1981 agttgctctt gcccggcgtc aatacgggat aataccgccc cacatagcag aactttaaaa
2041 gtgctcatca ttggaaagcg ttcttcgggg cgaaaactct caaggatctt accgctgttg
2101 agatccagtt cgatgtaacc cactcgcgca cccaactgat cttcagcatc ttttactttc
2161 accagcgttt ctgggtgagc aaaaacagga aggcaaaatg ccgcaaaaaa gggaataagg
2221 gcgacacgga aatggtgaat actcatactc ttcctttttc agtattattg aagcatttat
2281 cagggttatt gtctcatgag cggatacata tttgaatgta tttagaaaaa taaacaaata
2341 ggggttccgc gcacatttcc ccgaaaagtg ccacct

```

//

LOCUS pKE2\_MCS 2317 bp DNA CIRCULAR SYN  
DEFINITION Kanamycin-Resistant, ColE1 ori, Optimized Vector  
ACCESSION pKE2\_MCS

FEATURES Location/Qualifiers  
misc\_feature 1..330  
/note="Multiple Cloning Site"  
terminator 331..435  
/note="T1"  
/product="transcriptional terminator from rrnB operon"  
misc\_feature complement (437..437)  
/note="C->T AvrII"  
rep\_origin 442..1249  
/note="ColE1"  
/product="High Copy Origin of Replication"  
misc\_feature complement (839..839)  
/note="G->C ApaLI"  
misc\_feature complement (1250..1250)  
/note="A->G SpeI"  
terminator 1256..1361  
/note="T0"  
/product="transcriptional terminator from phage lambda"  
CDS complement (1387..2181)  
/note="KanR"  
misc\_feature complement (1367..2317)  
/note="KanR Region"

BASE COUNT 543 a 668 c 611 g 495 t

ORIGIN

```

1  gacgtctgtg caagtactac tgttctgcag tcacttgaat tcgataccca gctgggtgga
61  gtgcaccaag gagcatgcga aggaaacggt tcgcagaagc ttccgcaagg taccactttg
121 cgcgggagta tttgtacatt tgaaggatcc tcaagtcggc cccccgttcc atggatactc
181 gtcgaccatt acgctagccg tctggagctc ggactgctta agtcgctcca tatgctcgtt
241 cccgggacta cacaattgtc ccccggcgcc agggttgata tctatcgccc tagggaccgt
301 ctcgagagaa tcaatattaa tccaacgcgt ggcatcaaat aaaacgaaag gctcagtcga
361 aagactgggc ctttcgtttt atctgtttgt tgtcggtgaa cgctctcctg agtaggacaa
421 atccgccgcc ctagacttag gcgttcggct gcggcgagcg gtatcagctc actcaaaggc
481 ggtaatacgg ttatccacag aatcagggga taacgcagga aagaacatgt gagcaaaagg
541 ccagcaaaag gccaggaacc gtaaaaaggc cgcgttgctg gcgtttttcc ataggctccg
601 cccccctgac gagcatcaca aaaatcgacg ctcaagtcag aggtggcgaa acccgacagg
661 actataaaga taccaggcgt ttccccctgg aagctccctc gtgcgctctc ctgttccgac
721 cctgccgctt accggatacc tgtccgcctt tctcccttcg ggaagcgtgg cgcttttctc
781 tagctcacgc tgtaggtatc tcagttcggg gtaggtcgtt cgctccaagc tgggctgtct
841 gcacgaacc cccgttcagc ccgaccgctg cgccttatcc ggtaactatc gtcttgagtc
901 caaccgggta agacacgact tatcgccact ggacgcagcc actggtaaca ggattagcag
961 agcggaggtat gtaggcgggtg ctacagagtt cttgaagtgg tggcctaact acggctacac
1021 tagaaggaca gtatttggta tctgcgctct gctgaagcca gttaccttcg gaaaaagagt
1081 tggtagctct tgatccggca aacaaaccac cgctggtagc ggtggttttt ttgtttgcaa
1141 gcagcagatt acgcgcagaa aaaaaggatc tcaagaagat cctttgatct tttctacggg
1201 gtctgacgct cagtggaacg aaaactcacg ttaagggatt ttggtcatgg ctagtgtctg
1261 gattctcacc aataaaaaac gcccggcggc aaccgagcgt tctgaacaaa tccagatgga
1321 gttctgaggt cattactgga tctatcaaca ggagtccaag ccaattctcg aaccccagag
1381 tcccgctcag aagaactcgt caagaaggcg atagaaggcg atgcgctgcg aatcgggagc
1441 ggcgataccg taaagcacga ggaagcggtc agcccattcg ccgccaagct cttcagcaat
1501 atcacgggta gccaacgcta tgtcctgata gcggtccgcc acaccagcc ggccacagtc
1561 gatgaatcca gaaaagcggc cattttccac catgatattc ggcaagcagg catcgccgtg
1621 ggtcacgacg agatcctcgc cgtcgggcat acgvccttg agcctggcga acagtccggc
1681 tggcgcgagc ccctgatgct cttcgtccag atcatcctga tcgacaagac cggcttccat
1741 cggagtacgt gctcgctcga tgcgatggtt cgcttggtgg tcgaatgggc aggtagccgg
1801 atcaagcgta tgcagccgcc gcattgcatc agccatgatg gatactttct cggcaggagc
1861 aaggtaggat gacaggagat cctgccccgg cacttcgccc aatagcagcc agtccccttc
1921 cgcttcagtg acaacgtcga gcacagccgc gcaaggaacg cccgtcgtgg ccagccacga
1981 tagccgcgct gcctcgtctt gcagttcatt cagggcaccg gacaggtcgg tcttgacaaa
2041 aagaaccggg cgaccctgcg ctgacagccg gaacacggcg gcatcagagc agccgattgt
2101 ctgttgtgcc cagtcatagc cgaatagcct ctccaccaa gccgccggag aacctgcgtg
2161 caatccatct tgttcaatca tgcgaaacga tcctcatcct gtctcttgat cagatcttga
2221 tcccctgcgc catcagatcc ttggcggcaa gaaagccatc cagtttactt tgcagggctt
2281 cccaacctta ccagagggcg gcccaactgg caattcc

```

//

```

LOCUS      pKE3_MCS      2337 bp      DNA      CIRCULAR SYN
DEFINITION Chloramphenicol-Resistant, ColE1 ori, Optimized Vector
ACCESSION  pKE3_MCS
FEATURES   Location/Qualifiers
    misc_feature      1..330
                        /note="Multiple Cloning Site"
    terminator        331..435
                        /note="T1"
                        /product="transcriptional terminator from rrnB operon"
    misc_feature      437..437
                        /note="C->T AvrII"
    rep_origin        442..1249
                        /note="ColE1"

```

```

misc_feature      /product="High Copy Origin of Replication"
                  839..839
                  /note="G->C ApaLI"
misc_feature      1250..1250
                  /note="A->G SpeI"
terminator        1256..1361
                  /note="T0"
                  /product="transcriptional terminator from phage lambda"
CDS               complement (1256..1361)
                  /note="T0"
misc_feature      1420..1420
                  /note="C->T ScaI"
misc_feature      1525..1525
                  /note="T->C SspI"
misc_feature      1537..1537
                  /note="C->T NcoI"
misc_feature      1750..1750
                  /note="G->C AclI"
misc_feature      1834..1834
                  /note="C->T EcoRI"
misc_feature      1939..1939
                  /note="G->A PvuII"
CDS               complement (1393..2052)
                  /note="cat"
                  /product="Chloramphenicol Acetyltransferase"
rbs               complement (2065..2071)
                  /note="Shine-Dalgarno region"
-10_signal        complement (2093..2098)
                  /note="-10 box"
-35_signal        complement (2117..2122)
                  /note="-35 box"
promoter          complement (2076..2125)
                  /note="Promoter for cat"

```

BASE COUNT      599 a      582 c      566 g      590 t

ORIGIN

```

   1  gacgtctgtg caagtactac tgttctgcag tcacttgaat tcgataccca gctgggtgga
  61  gtgcaccaag gagcatgcga aggaaacggt tcgcagaagc ttccgcaagg taccactttg
 121  ccgcgaggta tttgtacatt tgaaggatcc tcaagtcggc cgcccgttcc atggatactc
 181  gtcgaccatt acgctagccg tctggagctc ggactgctta agtcgctcca tatgctcggt
 241  cccgggacta cacaattgtc ccccggcgcc agggttgata tctatcgccc tagggaccgt
 301  ctcgagagaa tcaatattaa tccaacgcgt ggcatcaaat aaaacgaaag gctcagtcga
 361  aagactgggc ctttcgtttt atctgttgtt tgtcggtgaa cgctctcctg agtaggacaa
 421  atccgccgcc ctagacttag gcgttcggct gcggcgagcg gtatcagctc actcaaaggc
 481  ggtaatacgg ttatccacag aatcagggga taacgcagga aagaacatgt gagcaaaagg
 541  ccagcaaaag gccaggaacc gtaaaaaggc cgcgttgctg gcgtttttcc ataggctccg
 601  cccccctgac gagcatcaca aaaatcgacg ctcaagtcag aggtggcgaa acccgacagg
 661  actataaaga taccaggcgt ttccccctgg aagctccctc gtgcgctctc ctgttccgac
 721  cctgccgctt accggatacc tgtccgcctt tctcccttcg ggaagcgtgg cgctttctca
 781  tagctcacgc tgtaggtatc tcagttcggg gtaggtcggt cgctccaagc tgggctgtct
 841  gcacgaacc cccgttcagc ccgaccgctg cgccttatcc ggtaactatc gtcttgagtc
 901  caaccgggta agacacgact tatcgccact ggacgagcc actggtaaca ggattagcag
 961  agcgagggat gtaggcggtg ctacagagtt cttgaagtgg tggcctaact acggctacac
1021  tagaaggaca gtatttggtg tctgcgctct gctgaagcca gttaccttcg gaaaaagagt
1081  tggtagctct tgatccggca aacaaccac cgctggtagc ggtggttttt ttgtttgcaa
1141  gcagcagatt acgcgcagaa aaaaaggatc tcaagaagat cttttgatct tttctacggg

```

1201 gtctgacgct cagtggaacg aaaactcacg ttaagggatt ttggatcatgg ctagtgcttg  
1261 gattctcacc aataaaaaaac gcccggcggc aaccgagcgt tctgaacaaa tccagatgga  
1321 gttctgaggt cttactgga tctatcaaca ggagtccaag ccaattctgc accaataact  
1381 gccttaaaaa aattacgcc cgccctgcca ctcatcgcaa tactgttgta attcattaag  
1441 cattctgccg acatggaagc catcacagac ggcatgatga acctgaatcg ccagcggcat  
1501 cagcaccttg tcgccttgcg tatagtattt gcccatagtg aaaacggggg cgaagaagtt  
1561 gtccatattg gccacgttta aatcaaaaact ggtgaaactc acccagggat tggctgagac  
1621 gaaaaacata ttctcaataa accctttagg gaaataggcc aggttttcac cgtaacacgc  
1681 cacatcttgc gaatatatgt gtagaaactg ccggaaatcg tcgtggtatt cactccagag  
1741 cgatgaaaag gtttcagttt gctcatggaa aacgggtgtaa caagggtgaa cactatccca  
1801 tatcaccagc tcaccgtctt tcattgccat acgaaattcc ggatgagcat tcacaggcg  
1861 ggcaagaatg tgaataaagg ccggataaaa cttgtgctta ttttcttta cggctcttaa  
1921 aaaggccgta atatccagtt gaacggtctg gttataggta cattgagcaa ctgactgaaa  
1981 tgcctcaaaa tgttctttac gatgccattg ggatatatca acgggtggtat atccagtgat  
2041 ttttttctcc attttagctt ctttagctcc tgaaaatctc gataactcaa aaaatacgcc  
2101 cggtagtgat cttatttcat tatggtgaaa gttggaacct cttacgtgcc gatcaacgtc  
2161 tcattttcgc caaaagttgg cccagggctt cccggtatca acagggacac caggatttat  
2221 ttattctgcg aagtgatctt ccgtcacagg tatttattcg gcgcaaagtg cgtcgggtga  
2281 tgctgccaac ttactgattt agtgtatgat ggtgtttttg aggtgctcca gtggctt

//

LOCUS GFPmut3b-LAA 756 bp DNA LINEAR SYN

DEFINITION Gene (Fluorescent Reporter)

ACCESSION pKLi011

FEATURES Location/Qualifiers  
CDS 1..756  
/note="GFPmut3b-LAA "  
primer\_bind 1..20  
/note="Fw. Primer Homology"  
misc\_feature complement (99..118)  
/note="spKDL022"  
misc\_feature 168..168  
/note="A->G NcoI"  
misc\_feature 231..231  
/note="T->C NdeI"  
misc\_feature 276..276  
/note="T->C BsrGI"  
misc\_feature 561..561  
/note="A->G MfeI"  
misc\_feature 675..675  
/note="A->C PvuII"  
misc\_signal 715..756  
/note="LAA tag"  
primer\_bind complement (737..756)  
/note="Rev. Primer Homology"

BASE COUNT 254 a 152 c 156 g 194 t

ORIGIN

```
1 atgcgtaaag gagaagaact tttcactgga gttgtcccaa ttcttggtga attagatggt
61 gatgttaatg ggcacaaatt ttctgtcagt ggagagggtg aaggatgatgc aacatacggga
121 aaacttacc ttaaatttat ttgcactact ggaaaactac ctggtccgtg gccaacactt
181 gtcactactt tcggttatgg tgttcaatgc ttgcgagat acccagatca catgaaacag
241 catgactttt tcaagagtgc catgcccgaa ggttacgtac aggaaagaac tatatTTTTc
301 aaagatgacg ggaactacaa gacacgtgct gaagtcaagt ttgaagggtga tacccttggt
361 aatagaatcg agttaaagg tattgatttt aaagaagatg gaaacattct tggacacaaa
421 ttggaataca actataactc acacaatgta tacatcatgg cagacaaaca aaagaatgga
481 atcaaagtta acttcaaaat tagacacaac attgaagatg gaagcgttca actagcagac
541 cattatcaac aaaatactcc gattggcgat ggccctgtcc ttttaccaga caaccattac
601 ctgtccacac aatctgccct ttcgaaagat cccaacgaaa agagagacca catggtcctt
661 cttgagtttg taaccgctgc tgggattaca catggcatgg atgaactata caaaactagc
721 gcagcgaacg acgaaaatta cgcccttgca gcgtga
```

//

LOCUS lacI-LAA 1122 bp DNA LINEAR SYN

DEFINITION Gene (Repressor)

ACCESSION pKLi017

FEATURES Location/Qualifiers  
CDS 1..1122  
/note="lacI-LAA"  
primer\_bind 1..20  
/note="Fw. Primer Homology"  
misc\_feature 16..16  
/note="T->C AcII"  
misc\_feature 18..18  
/note="A->G AcII"  
misc\_feature 333..333



```

misc_feature      /note="G->T ApaLI"
                  351..351
misc_feature      /note="A->G MluI"
                  801..801
misc_feature      /note="T->C EcoRV"
                  993..993
misc_signal       /note="G->T KasI"
                  1081..1122
primer_bind       /note="LAA tag"
                  complement (1103..1122)
                  /note="Rev. Primer Homology"
BASE COUNT       253 a    313 c    318 g    238 t
ORIGIN

```

```

1 atgaaaccag taacgctgta cgatgtcgca gagtatgccg gtgtctctta tcagaccggt
61 tcccgcgtgg tgaaccaggc cagccacggt tctgcgaaaa cgcgggaaaa agtgggaagcg
121 gcgatggcgg agctgaatta cattccaac cgctggcac aacaactggc gggcaaacag
181 tcgttgctga ttggcgttgc cacctccagt ctggccctgc acgcgccgtc gcaaattgtc
241 gcggcgatta aatctcgcgc cgatcaactg ggtgccagcg tggtggtgtc gatggtagaa
301 cgaagcggcg tcgaagcctg taaagcggcg gttcacaatc ttctcgcgca gcgcgtcagt
361 gggctgatca ttaactatcc gctggatgac caggatgcca ttgctgtgga agctgcctgc
421 actaatgttc cggcgttatt tcttgatgtc tctgaccaga caccatcaa cagtattatt
481 ttctcccatg aagacggtac gcgactgggc gtggagcatc tggtcgcatt gggtcaccag
541 caaatcgcgc tgttagcggg cccattaagt tctgtctcgg cgcgtctcgg tctggctggc
601 tggcataaat atctcactcg caatcaaatt cagccgatag cggaacggga aggcgactgg
661 agtgccatgt ccggttttca acaaaccatg caaatgctga atgagggcat cgttcccact
721 gcgatgctgg ttgccaacga tcagatggcg ctgggcgcaa tgcgcgccat taccgagtcc
781 gggctgcgcg ttggtgcgga catctcggta gtgggatacg acgataccga agacagctca
841 tgttatatcc cgccgttaac caccatcaa caggattttc gcctgctggg gcaaaccagc
901 gtggaccgct tgctgcaact ctctcagggc caggcgggtga agggcaatca actgttgccc
961 gtctcactgg tgaaaagaaa aaccaccctg gctcccaata cgcaaaccgc ctctccccgc
1021 gcgttggcgg attcattaat gcaactggca cgacaggttt cccgactgga aagcgggcag
1081 actagcgcag cgaacgacga aaattacgcc cttgcagcgt ga

```

//

```

LOCUS      tetR-LAA 663 bp    DNA    LINEAR    SYN
DEFINITION Gene (Repressor)
ACCESSION  pKLi019

```

```

FEATURES             Location/Qualifiers
     CDS               1..663
                       /note="tetR-LAAP"
     primer_bind       1..20
                       /note="Fw. Primer Homology"
     misc_feature       7..7
                       /note="A->C XbaI"
     misc_feature       9..9
                       /note="A->T XbaI"
     misc_feature       582..582
                       /note="A->C NdeI"
     misc_signal        622..663
                       /note="LAA tag"
     primer_bind       complement (644..663)
                       /note="Rev. Primer Homology"

```

```

BASE COUNT       211 a    128 c    148 g    176 t

```

ORIGIN

```

1 atgtctcgtt tagataaaag taaagtgatt aacagcgcag tagagctgct taatgaggtc

```

```

61 ggaatcgaag gtttaacaac ccgtaaactc gccagaagc taggtgtaga gcagcctaca
121 ttgtattggc atgtaaaaaa taagcgggct ttgctcgac ccttagccat tgagatgtta
181 gataggcacc atactcactt ttgcccttta gaaggggaaa gctggcaaga ttttttacgt
241 aataacgcta aaagttttag atgtgcttta ctaagtcac gcgatggagc aaaagtacat
301 ttaggtacac ggcctacaga aaaacagtat gaaactctc aaaatcaatt agccttttta
361 tgccaacaag gtttttctact agagaatgca ttatatgcac tcagcgctgt ggggcatttt
421 acttttaggtt gcgtattgga agatcaagag catcaagtcg ctaaagaaga aagggaaca
481 cctactactg atagtatgcc gccattatta cgacaagcta tcgaattatt tgatcaccaa
541 ggtgcagagc cagccttctt attcggcctt gaattgatca tctgcggatt agaaaaacaa
601 cttaaagtg aaagtgggtc tactagcgca gcgaacgacg aaaattacgc cttgcagcg
661 tga

```

//

LOCUS cI-LAA 753 bp DNA LINEAR SYN

DEFINITION Gene (Repressor)

ACCESSION pKLi021

FEATURES Location/Qualifiers

CDS 1..753  
 /note="cI-LAA"  
 primer\_bind 1..20  
 /note="Fw. Primer Homology"  
 misc\_feature 477..477  
 /note="A->G HindIII"  
 misc\_signal 712..753  
 /note="LAA tag"  
 primer\_bind complement (724..753)  
 /note="Rev. Primer Homology"

BASE COUNT 221 a 157 c 189 g 186 t

ORIGIN

```

1 atgagcacia aaaagaaacc attaacacia gagcagcttg aggacgcacg tcgccttaa
61 gcaatttatg aaaaaaagaa aatgaactt ggcttatccc agaatctgt cgagacaaag
121 atgggatgg ggcagtcagg cgttgggtgct ttatttaatg gcatcaatgc attaatgct
181 tataacgccg cattgcttgc aaaaattctc aaagttagcg ttgaagaatt tagcccttca
241 atgccagag aatctacga gatgtatgaa gcggttagta tgcagccgctc acttagaagt
301 gagtatgagt accctgtttt ttctcatggt caggcagga tgttctcacc tgagcttaga
361 acctttacca aaggtgatgc ggagagatgg gtaagcacia ccaaaaaagc cagtgattct
421 gcattctggc ttgaggttga aggtaattcc atgaccgac caacaggctc caagccgagc
481 tttcctgacg gaatgttaat tctcgttgac cctgagcagg ctgttgagcc aggtgatttc
541 tgcatagcca gacttggggg tgatgagttt accttcaaga aactgatcag ggatagcggg
601 caggtgtttt tacaaccact aaaccacag taccaatga tcccatgcaa tgagagttgt
661 tccgttggg ggaaagttat cgctagtcag tggcctgaag agacgtttgg cactagcgca
721 gcgaacgacg aaaattacgc cttgcagcg tga

```

//

LOCUS flpE-LAA 1305 bp DNA LINEAR SYN

DEFINITION Gene (Repressor)

ACCESSION pKLi025

FEATURES Location/Qualifiers

CDS 1..1305  
 /note="flpE-LAA "  
 primer\_bind 1..20  
 /note="Fw. Primer Homology"  
 misc\_feature 345..345  
 /note="T->C EcoRV"  
 misc\_feature 507..507

```

misc_feature      /note="G->T XhoI"
                  508..508
misc_feature      /note="A->C XhoI"
                  510..510
misc_feature      /note="A->C XhoI"
                  564..564
misc_feature      /note="T->C MfeI"
                  594..594
misc_feature      /note="T->G AcII"
                  597..597
misc_feature      /note="T->C AcII"
                  1068..1068
misc_feature      /note="A->G SpeI"
                  1089..1089
misc_feature      /note="A->G NdeI"
                  1140..1140
misc_feature      /note="A->G MfeI"
                  1264..1305
misc_signal       /note="LAA tag (RI linker)"
                  complement (1286..1305)
primer_bind      /note="Rev. Primer Homology"
BASE COUNT       462 a    245 c    259 g    339 t
ORIGIN

```

```

1 atgagccaat ttgatatatt atgtaaaaca ccacctaagg tcctggttcg tcagtttgtg
61 gaaaggtttg aaagaccttc aggggaaaaa atagcatcat gtgctgctga actaacctat
121 ttatgttggg tgattactca taacgggaaca gcaatcaaga gagccacatt catgagctat
181 aatactatca taagcaattc gctgagtttc gatattgtca acaaatcact ccagttttaa
241 tacaagacgc aaaaagcaac aattctggaa gcctcattaa agaaattaat tcctgcttgg
301 gaatttacia ttattcctta caatggacaa aaacatcaat ctgacatcac tgatattgta
361 agtagtttgc aattacagt cgaatcatcg gaagaagcag ataagggaaa tagccacagt
421 aaaaaaatgc ttaaagcact tctaagtgag ggtgaaagca tctgggagat cactgagaaa
481 atactaaatt cgtttgagta tacctctcgc tttaaaaaa caaaaacttt ataccaattc
541 ctcttcctag ctactttcat caactgtgga agattcagcg atattaagaa cgtggaccgg
601 aatcatttta aattagtcca aaataagtat ctgggagtaa taatccagtg tttagtgaca
661 gagacaaaga caagcgttag taggcacata tacttcttta gcgcaagggg taggatcgat
721 ccacttgatg atttggatga atttttgagg aactctgaac cagtcctaaa acgagtaaat
781 aggaccggca attcttcaag caacaaacag gaataccaat tattaanaaga taacttagtc
841 agatcgtaca acaaggcttt gaagaaaaat gcgccttata caatctttgc tataaagaat
901 ggcccaaaat ctcacattgg aagacatttg atgacctcat ttctgtcaat gaagggccta
961 acggagtgtg ctaatgttgt gggaaattgg agcgataagc gtgcttctgc cgtggccagg
1021 acaacgtata ctcatcagat aacagcaata cctgatcact acttcgagct agtttctcgg
1081 tactatgctg atgatccaat atcaaaggaa atgatagcat tgaaggatga gactaatccg
1141 attgaggagt ggcagcatat agaacagcta aagggtagtg ctgaaggaag catacgatac
1201 cccgcatgga atgggataat atcacaggag gtactagact acctttcatc ctacataaat
1261 agacgcatag cagcaaacga cgaaaactac gctttagcag cttaa

```

//

```

LOCUS      T0 123 bp    DNA    LINEAR    SYN
DEFINITION Transcriptional Terminator
ACCESSION  pKLi027
FEATURES   Location/Qualifiers
misc_feature 1..123
              /note="T0"
primer_bind  1..20
              /note="Fw. Primer Homology"

```

```

misc_feature      15..109
                  /note="T0"
primer_bind      complement (104..123)
                  /note="Rev. Primer Homology"
BASE COUNT       28 a      27 c      32 g      36 t
ORIGIN
    1 cgagaattgg cttggactcc tgttgataga tccagtaatg acctcagaac tccatctgga
    61 tttgttcaga acgctcgggt gccgccgggc gttttttatt ggtgagaatc caagcagtag
    121 tca
//

```

```

LOCUS      T1T2 231 bp   DNA   LINEAR   SYN
DEFINITION Transcriptional Terminator
ACCESSION  pKLi028
FEATURES   Location/Qualifiers
    misc_feature      1..231
                  /note="T1T2"
    primer_bind      1..20
                  /note="Fw. Primer Homology"
    misc_feature      15..58
                  /note="T1"
    misc_feature      121..121
                  /note="T->C AcII"
    misc_feature      190..217
                  /note="T2"
    primer_bind      complement (212..231)
                  /note="Rev. Primer Homology"
BASE COUNT   59 a      56 c      67 g      49 t
ORIGIN
    1 gctagaggca tcaaataaaa cgaaaggctc agtcgaaaga ctgggccttt cgttttatct
    61 gttgtttgtc ggtgaacgct ctcctgagta ggacaaatcc gccgggagcg gatttgaacg
    121 ctgcgaagca acggcccgga ggggtggcggg caggacgcc gccataaact gccaggcatc
    181 aaattaagca gaaggccatc ctgacggatg gcctttttgc gtttctacaa a
//

```

```

LOCUS      PLtet0          74 bp   DNA   LINEAR   SYN
DEFINITION Promoter
ACCESSION  pKLi030
FEATURES   Location/Qualifiers
    promoter      1..74
                  /note="PLtet0"
    protein_bind  1..19
                  /note="Otet2"
                  /bound_moiety="TetR"
    primer_bind  1..28
                  /note="Fw. Primer Homology"
    -35_signal   20..25
                  /note="-35 Box"
    protein_bind  26..44
                  /note="Otet2"
                  /bound_moiety="TetR"
    -10_signal   43..48
                  /note="-10 box"
    misc_feature  55
                  /note="Transcriptional Start"

```

```

    primer_bind      complement (55..74)
                    /note="Rev. Primer Homology"
BASE COUNT          23 a      19 c      16 g      16 t
ORIGIN
    1 tccctatcag tgatagagat tgacatccct atcagtgata gagatactga gcacatcagc
    61 aggacgcact gacc
//

```

```

LOCUS      PLS1con      558 bp      DNA      LINEAR      SYN
DEFINITION Promoter
ACCESSION  pKLi031

```

```

FEATURES             Location/Qualifiers
    promoter          1..558
                    /note="PL(s1con)"
    primer_bind       1..20
                    /note="Fw. Primer Homology"
    protein_bind      7..23
                    /note="OL3"
    protein_bind      27..43
                    /note="OL2"
    -35_signal        41..46
                    /note="-35 box"
    protein_bind      51..67
                    /note="OL1"
    -10_signal        65..69
                    /note="-10 box"
    misc_feature      75
                    /note="Transcription Start"
    primer_bind       complement (539..558)
                    /note="Rev. Primer Homology"

```

```

BASE COUNT          181 a      133 c      134 g      110 t
ORIGIN
    1 acagataacc atctgcggtg ataaattatc tctggcgggtg ttgacataaa taccactggc
    61 ggtgatactg agcacatcag caggacgcac tgaccacat gaaggtgacg ctcttaaaaa
    121 ttaagccctg aagaaggca gattcaaag cagaaggctt tggggtgtgt gatacgaaac
    181 gaagcattgg ccgtaagtgc gattccggat tagctgccaa tgtgccaatc gcgggggggtt
    241 ttcgttcagg actacaactg ccacacacca ccaaagctaa ctgacaggag aatccagatg
    301 gatgcacaaa cagcgcgccc cgaacgtcgc gcagagaaac aggctcaatg gaaagcagca
    361 aatccccctgt tggttgggggt aagcgcaaaa ccagttccga aagatTTTTT taactataaa
    421 cgctgatgga agcgtttatg cggaagaggt aaagcccttc ccgagtaaca aaaaaacaac
    481 agcataaata accccgctct tacacattcc agccctgaaa aagggcacatca aattaaacca
    541 cacctatggt gtatgcaa
//

```

```

LOCUS      Ptrc2 75 bp      DNA      LINEAR      SYN
DEFINITION Promoter
ACCESSION  pKLi032

```

```

FEATURES             Location/Qualifiers
    promoter          1..75
                    /note="Ptrc-2"
    primer_bind       1..20
                    /note="Fw. Primer Homology"
    -35_signal        14..19
                    /note="-35 Box"
    -10_signal        37..42

```

```

        /note="-10 box"
misc_feature      49
        /note="Transcription Start"
protein_bind      49..69
        /note="Olac"
        /bound_moiety="LacI"
primer_bind       complement (56..75)
        /note="Rev. Primer Homology"
BASE COUNT        23 a      13 c      17 g      22 t
ORIGIN
      1 ctgaaatgag ctgttgacaa ttaatcatcc ggctcgtata atgtgtggaa ttgtgagcgg
     61 ataacaattt cacac
//

```

```

LOCUS      PBAD 286 bp      DNA      LINEAR      SYN
DEFINITION Promoter
ACCESSION  pKLi034
FEATURES

```

```

Location/Qualifiers
promoter       1..286
               /note="pBAD "
primer_bind    1..20
               /note="Fw. Primer Homology"
protein_bind   4..20
               /note="AraO2"
misc_feature   12..12
               /note="T->A MfeI"
misc_feature   135..135
               /note="A->G MluI"
protein_bind   140..157
               /note="AraC"
protein_bind   160..177
               /note="AraC"
protein_bind   182..203
               /note="CRP-cAMP"
protein_bind   214..230
               /note="AraI1"
protein_bind   235..252
               /note="AraI2"
misc_feature   244..244
               /note="C->A BamHI"
-35_signal     245..253
               /note="-35 box"
-10_signal     270..277
               /note="-10 box"
primer_bind    complement (267..286)
               /note="Rev. Primer Homology"
BASE COUNT        86 a      74 c      47 g      79 t
ORIGIN

```

```

      1 aagaaaccaa tagtccatat tgcacagac attgccgtca ctgcgtcttt tactggctct
     61 tctcgctaac caaacggta accccgctta ttaaagcat tctgtaacaa agcggggacca
    121 aagccatgac aaaagcgcgt aacaaaagtg tctataatca cggcagaaaa gtccacattg
    181 attatttgca cggcgtcaca ctttgctatg ccatagcatt tttatccata agattagcgg
    241 atcatacctg acgcttttta tcgcaactct ctactgtttc tccata
//

```

LOCUS mCherry-LAA 750 bp DNA LINEAR SYN  
DEFINITION Gene (Fluorescent Reporter)  
ACCESSION pKLi037

FEATURES Location/Qualifiers  
primer\_bind 1..20  
/note="Fw. Primer Homology"  
CDS 1..750  
/note="mCherry-LAA"  
misc\_feature 63..63  
/note="G->T ApaLI"  
misc\_feature 357..357  
/note="G->A PstI"  
misc\_feature 435..435  
/note="C->T NcoI"  
misc\_feature 483..483  
/note="C->G KasI"  
misc\_feature 579..579  
/note="G->A PvuII"  
misc\_feature 591..591  
/note="C->G KasI"  
misc\_feature 705..705  
/note="C->T BsrGI"  
misc\_feature 709..750  
/note="LAA tag"  
primer\_bind complement (731..750)  
/note="Rev. Primer Homology"

BASE COUNT 178 a 233 c 230 g 109 t  
ORIGIN

```
1 atggtgagca agggcgagga ggataacatg gccatcatca aggagtcat gcgcttcaag
61 gttcacatgg agggctccgt gaacggccac gagttcgaga tcgagggcga gggcgagggc
121 cgcccctacg agggcaccca gaccgccaag ctgaagggtga ccaagggtgg ccccctgcc
181 ttcgcctggg acatcctgtc ccctcagttc atgtacggct ccaaggccta cgtgaagcac
241 cccgccgaca tccccgacta cttgaagctg tccttccccg agggcttcaa gtgggagcgc
301 gtgatgaact tcgaggacgg cggcgtgggtg accgtgacc accgactctc cctgcaagac
361 ggcgagttca tctacaaggt gaagctgctg ggaccaact tcccctccga cggccccgta
421 atgcagaaga agactatggg ctgggaggcc tcctccgagc ggatgtacc cgaggacggc
481 gcgctgaagg gcgagatcaa gcagaggctg aagctgaagg acggcggcca ctacgacgct
541 gaggtcaaga ccacctaca ggccaagaag cccgtgcaac tgcccggcgc gtacaacgctc
601 aacatcaagt tggacatcac ctcccacaac gaggactaca ccatcgtgga acagtacgaa
661 cgcgccgagg gccgccactc caccggcggc atggacgagc tgtataagac tagcgcagcg
721 aacgacgaaa attacgcct tgcagcgtga
```

//

LOCUS luxI-LAA 618 bp DNA LINEAR SYN  
DEFINITION Gene (Quorum Sensing)  
ACCESSION pKLi047

FEATURES Location/Qualifiers  
primer\_bind 1..20  
/note="Fw. Primer Homology"  
CDS 1..618  
/note="LuxI-LAA"  
misc\_feature 577..618  
/note="LAA tag"  
primer\_bind complement (599..618)

```

                                /note="Rev. Primer Homology"
BASE COUNT      221 a      84 c      119 g      194 t
ORIGIN
    1 atgactataa tgataaaaaa atcggatttt ttggcaattc catcggagga gtataaaggt
   61 attctaagtc ttcgttatca agtgtttaag caaagacttg agtgggactt agttgtagaa
  121 aataaccttg aatcagatga gtatgataac tcaaatgcag aatatattta tgcttgtgat
  181 gatactgaaa atgtaagtgg atgctggcgt ttattaccta caacaggtga ttatatgctg
  241 aaaagtgttt ttcctgaatt gcttgggtaa cagagtgctc ccaaagatcc taatatagtc
  301 gaattaagtc gttttgctgt aggtaaaaat agctcaaaga taaataactc tgctagttaa
  361 attacaatga aactatttga agctatatat aaacacgctg ttagtcaagg tattacagaa
  421 tatgtaacag taacatcaac agcaatagag cgatttttaa agcgtattaa agttccttgt
  481 catcgtattg gagacaaaga aattcatgta ttaggtgata ctaaactcgg tgtattgtct
  541 atgcctatta atgaacagtt taaaaaagca gtcttaaatg ctgcaaacga cgaaaactac
  601 gcttttagtg cttataaa

```

//

```

LOCUS      Plux-cI      97 bp      DNA      LINEAR      SYN
DEFINITION Hybrid Promoter
ACCESSION  pKLi048

```

```

FEATURES             Location/Qualifiers
    primer_bind       1..20
                       /note="Fw. Primer Homology"
    promoter          1..97
                       /note="Plux/cI"
    protein_bind      6..25
                       /note="LuxR_AHL binding site"
                       /bound_moiety="LuxR"
    protein_bind      57..74
                       /note="cI binding site 1"
                       /bound_moiety="cI"
    protein_bind      81..97
                       /note="cI binding site 2"
                       /bound_moiety="cI"
    primer_bind       complement (78..97)
                       /note="Rev. Primer Homology"

```

```

BASE COUNT      26 a      17 c      24 g      30 t
ORIGIN
    1 taagcacctg taggatcgta caggtttacg caagaaaatg gtttgttata gtcgaataac
   61 accgtgcgtg ttgactattt tacctctggc ggtgata

```

//

```

LOCUS      luxR 756 bp      DNA      LINEAR      SYN
DEFINITION Gene (Activator)
ACCESSION  pKLi049

```

```

FEATURES             Location/Qualifiers
    CDS              1..756
                       /note="LuxR"
    primer_bind      1..20
                       /note="Fw. Primer Homology"
    misc_feature      54..54
                       /note="T->G HindIII"
    misc_feature      120..120
                       /note="T->C SspI"
    misc_feature      204..204
                       /note="A->G SspI"

```



```

misc_feature      582..582
                  /note="A->G SphI"
misc_feature      618..618
                  /note="A->C SspI"
misc_feature      729..729
                  /note="T->C MfeI"
primer_bind       complement (737..756)
                  /note="Rev. Primer Homology"
BASE COUNT        295 a    121 c    111 g    229 t
ORIGIN
    1 atgaaaaaca taaatgccga cgacacatac agaataatta ataaaattaa agcgtgtaga
   61 agcaataatg atattaatca atgcttatct gatatgacta aatgggtaca ttgtgaatac
  121 tatttactcg cgatcattta tcctcattct atggttaaat ctgatatttc aatcctagat
  181 aattacccta aaaaatggag gcagttattat gatgacgcta atttaataaa atatgatcct
  241 atagtagatt attctaactc caatcattca ccaattaatt ggaatatatt tgaaaacaat
  301 gctgtaaata aaaaatctcc aaatgtaatt aaagaagcga aaacatcagg tcttatcact
  361 gggtttagtt tccctattca tacggctaac aatggcttcg gaatgcttag ttttgacacat
  421 tcagaaaaag acaactatat agatagttta tttttacatg cgtgtatgaa catacatta
  481 attgttcctt ctctagttga taattatcga aaaataaata tagcaaataa taaatcaaac
  541 aacgatttaa ccaaaagaga aaaagaatgt ttagcgtggg cgtgcgaagg aaaaagctct
  601 tgggatattt caaaaatctt aggttgcagt gagcgtactg tcactttcca tttaaccaat
  661 gcgcaaatga aactcaatac aacaaaccgc tgccaaagta tttctaaagc aattttaaca
  721 ggagcaatcg attgcccata ctttaaaaaa taataa
//

```

```

LOCUS      araC_JK-LAA 879 bp    DNA    LINEAR    SYN        02-JUN-2011
DEFINITION Gene (Activator)
ACCESSION  pKLi046
FEATURES   Location/Qualifiers
    CDS     1..879
            /note="AraC-LAA_Keasling "
    primer_bind 1..20
            /note="Fw. Primer Homology"
    misc_feature 16..18
            /note="N6I JK"
    misc_feature 193..195
            /note="V65G JK"
    misc_feature 339..339
            /note="A->C SspI"
    misc_feature 475..475
            /note="T->C MfeI"
    misc_feature 493..495
            /note="E165G JK"
    misc_feature 505..507
            /note="E169V JK"
    misc_feature 588..588
            /note="T->C EcoRV"
    misc_feature 670..670
            /note="T->C AflIII"
    misc_feature 672..672
            /note="A->G AflIII"
    misc_feature 877..879
            /note="C280* JK"
    primer_bind complement (860..879)
            /note="Rev. Primer Homology"

```

BASE COUNT        186 a     231 c     246 g     216 t  
ORIGIN

```
1 atggctgaag cgcaaatcga tcccctgctg ccgggatact cgtttaacgc ccatctggtg
61 gcgggtttaa cgccgattga ggccaacggg tatctcgatt tttttatcga ccgaccgctg
121 ggaatgaaag gttatatctt caatctcacc attcgcggtc aggggggtggt gaaaaatcag
181 ggacgagaat ttggttgccg accgggtgat attttgctgt tcccgccagg agagattcat
241 cactacggtc gtcacccgga ggctcgcgaa tggatcacc agtgggttta ctttcgtccg
301 cgcgcctact ggcatgaatg gcttaactgg ccgtcaatct tgccaatac gggtttcttt
361 cgcccggatg aagcgcacca gccgcatttc agcgacctgt ttgggcaaat cattaacgcc
421 gggcaagggg aagggcgcta ttcggagctg ctggcgataa atctgcttga gcaactgtta
481 ctgcggcgca tgggtgcatg taacgtgctg ctccatccac cgatggataa tcgggtacgc
541 gaggcttgtc agtacatcag cgatcacctg gcagacagca attttgacat cgccagcgtc
601 gcacagcatg tttgcttgtc gccgtcgcgt ctgtcacatc ttttccgcca gcagttaggg
661 attagcgtcc tgagctggcg cgaggaccaa cgcattagtc aggcgaagct gcttttgagc
721 actaccgga tgcctatcgc caccgtcggg cgcaatgttg gttttgacga tcaactctat
781 ttctcgcgag tattaataaa atgcaccggg gccagcccga gcgagtttctg tgccggtact
841 agcgcagcga acgacgaaaa ttacgccctt gcagcgtga
```

//

LOCUS            Plac/ara 483 bp     DNA    LINEAR    SYN  
DEFINITION     Hybrid Promoter  
ACCESSION      pKLi053

FEATURES  
                  Location/Qualifiers  
  protein\_bind    1..28  
                  /note="Olac1"  
  primer\_bind    1..48  
                  /note="Fw. Primer Homology"  
  promoter        1..483  
                  /note="Plac/ara "  
  misc\_feature    376..376  
                  /note="C->T SalI, XhoI"  
  protein\_bind    382..401  
                  /note="araI1"  
  misc\_feature    414..414  
                  /note="C->A BamHI"  
  misc\_feature    418..418  
                  /note="G->T HindIII"  
  protein\_bind    425..444  
                  /note="Os"  
  misc\_feature    429..429  
                  /note="G->T MfeI"  
  protein\_bind    456..483  
                  /note="Olac1"  
  misc\_feature    457..457  
                  /note="A->G MfeI"  
  primer\_bind    complement (436..483)  
                  /note="Rev. Primer Homology"

BASE COUNT        162 a     104 c     111 g     106 t  
ORIGIN

```
1 aattgtgagc ggataacaat ttcacacagg gccctcggac accgaggaga atgtcaagag
61 gcgaacacac aacgtcttgg agcgccagag gaggaacgag ctaaacgga gcttttttgc
121 cctgcgtgac cagatcccgg agttggaaaa caatgaaaag gcccccaagg tagttatcct
181 taaaaaagcc acagcataka tcctgtccgt ccaagcagag gagcaaaagc tcatttctga
241 agaggacttg ttgcggaaac gacgagaaca gttgaaacac aaacttgaac agctacggaa
301 ctcttgtgcg taaggaaaag taaggaaaac gattccttct aacagaaatg tcctgagtca
```

```
361 cctatgaact gtcgattcga gcatagcatt tttatccata agattagcgg atcataatct
421 ttacaatfff gagcgctcac aattatgata gattcagttg tgagcggata acaatttcac
481 aca
```

//

LOCUS PmgrB 543 bp DNA LINEAR SYN

DEFINITION Promoter

ACCESSION pKLi054

FEATURES Location/Qualifiers

|              |                              |
|--------------|------------------------------|
| promoter     | 1..543                       |
|              | /note="PmgrB"                |
| primer_bind  | 1..20                        |
|              | /note="Fw. Primer Homology"  |
| -35_signal   | 480..485                     |
|              | /note="-35 box"              |
| misc_feature | 500..500                     |
|              | /note="G->C SphI"            |
| -10_signal   | 509..514                     |
|              | /note="-10 box"              |
| misc_feature | 518..518                     |
|              | /note="TSS"                  |
| primer_bind  | complement (524..543)        |
|              | /note="Rev. Primer Homology" |

BASE COUNT 162 a 112 c 112 g 157 t

ORIGIN

```
1 gatgagagta agaacctgtc ggaatatcaa acagacaggt tctttattta gcatgagaaa
61 aataaagtgt aaggtggcgt tatattaaac gcgcttgcta taagagtatt ttactcagga
121 gtgagaatct ggttatttat tgcccttaac cattatcgac cagcatattg cttttgcgta
181 acagcgggca atctgtttat cccaaaaaac cacttttagt gtgcaagtat tgtaccgtgc
241 tggtgcctct ggcagtcaga taggtacatt gcaaacctaa tcctgcggca ttctctttgc
301 ttccaatcaa aacgccatat cgcgtgagta ataatcctat ccataccagt gctatcagca
361 taactgtgcg aatgatgaat cgcattacaa cctcttctct ttttatgttc gcttaatcgt
421 agcggcaata tgcgctgaag caagcgactc attccgaaaa agcacgaata tcgacatagt
481 taggcgctgt ttaactaacc catgctagtt taatgacata aggtaggtga aacggagatt
541 gga
```

//

LOCUS Plux 219 bp DNA LINEAR SYN

DEFINITION Promoter

ACCESSION pKLi055

FEATURES Location/Qualifiers

|             |                              |
|-------------|------------------------------|
| primer_bind | 1..20                        |
|             | /note="Fw. Primer Homology"  |
| promoter    | 1..219                       |
|             | /note="Plux"                 |
| primer_bind | complement (524..543)        |
|             | /note="Rev. Primer Homology" |

BASE COUNT 64 a 39 c 40 g 76 t

ORIGIN

```
1 acccatctct ttatccttac ctattgtttg tcgcaagttt tgcgtgttat atatcattaa
61 aacggtaatg gattgacatt tgattctaataaattggatt tttgtcacac tattgtatcg
121 ctgggaatac aattacttaa cataagcacc ttaggatcg tacaggttta cgcaagaaaa
181 tggtttgta tagtcgaata tcagcaggac gcaactgacc
```

//

LOCUS mCherry-LAA-LCOpt 750 bp DNA LINEAR SYN  
DEFINITION Gene (Fluorescent Reporter)  
ACCESSION pKLi056

FEATURES Location/Qualifiers  
CDS 1..750  
/note="mCherry-LAA-LCOpt"  
primer\_bind 1..20  
/note="Fw. Primer Homology"  
misc\_feature 18..18  
/note="G->A LC"  
misc\_feature 21..21  
/note="G->A LC"  
misc\_feature 63..63  
/note="G->T ApaLI"  
misc\_feature 357..357  
/note="G->A PstI"  
misc\_feature 435..435  
/note="C->T NcoI"  
misc\_feature 483..483  
/note="C->G KasI"  
misc\_feature 579..579  
/note="G->A PvuII"  
misc\_feature 591..591  
/note="C->G KasI"  
misc\_feature 705..705  
/note="C->T BsrGI"  
misc\_feature 709..750  
/note="LAA tag"  
primer\_bind complement (731..750)  
/note="Rev. Primer Homology"

BASE COUNT 180 a 233 c 228 g 109 t  
ORIGIN

```
1 atggtgagca agggcgaaga agataacatg gccatcatca aggagttcat gcgcttcaag
61 gttcacatgg agggctccgt gaacggccac gagttcgaga tcgagggcga gggcgagggc
121 cgcccctacg agggcaccca gaccgccaag ctgaagggtga ccaagggtgg ccccctgccc
181 ttgccttggg acatcctgtc ccctcagttc atgtacggct ccaaggccta cgtgaagcac
241 cccgccgaca tccccgacta cttgaagctg tccttccccg agggcttcaa gtgggagcgc
301 gtgatgaact tcgaggacgg cggcgtgggtg accgtgacct aggactcctc cctgcaagac
361 ggcgagttca tctacaaggt gaagctgctc ggcaccaact tcccctccga cggccccgta
421 atgcagaaga agactatggg ctgggaggcc tcctccgagc ggatgtacct cgaggacggc
481 gcgctgaagg gcgagatcaa gcagaggctg aagctgaagg acggcggcca ctacgacgct
541 gaggtcaaga ccacctaca ggccaagaag cccgtgcaac tgcccggcgc gtacaacgctc
601 aacatcaagt tggacatcac ctcccacaac gaggactaca ccatcgtgga acagtacgaa
661 cgcgccgagg gccgccactc caccggcggc atggacgagc tgtataagac tagcgcagcg
721 aacgacgaaa attacgcctc tgcagcgtga
```

//

LOCUS 50bp Spacer 50 bp DNA LINEAR SYN  
DEFINITION Spacer  
ACCESSION pKLi057

FEATURES Location/Qualifiers  
misc\_feature 1..50  
/note="50bp Spacer"  
primer\_bind 1..20  
/note="Fw. Primer Homology"

```

        primer_bind      complement (31..50)
                          /note="Rev. Primer Homology"
BASE COUNT      22 a      7 c      10 g      11 t
ORIGIN
      1 agcttgatt gtgagaataa tgaagcgaa aagaatctg ccacatacaa
//

LOCUS      100bp Spacer 100 bp      DNA      LINEAR      SYN
DEFINITION      Spacer
ACCESSION      pKLi058
FEATURES
      Location/Qualifiers
      misc_feature      1..100
                          /note="100bp Spacer"
      primer_bind      1..20
                          /note="Fw. Primer Homology"
      primer_bind      complement (81..100)
                          /note="Rev. Primer Homology"
BASE COUNT      40 a      19 c      20 g      21 t
ORIGIN
      1 agcttgatt gtgagaataa tgaagcgaa aagaatctg ccacatacaa cattgggtcaa
      61 cgaatgcatt gcgcaatcac accaaagggtt caatgcaaag
//

LOCUS      250bp Spacer 250 bp      DNA      LINEAR      SYN
DEFINITION      Spacer
ACCESSION      pKLi059
FEATURES
      Location/Qualifiers
      misc_feature      1..250
                          /note="250bp Spacer "
      primer_bind      1..20
                          /note="Fw. Primer Homology"
      primer_bind      complement (231..250)
                          /note="Rev. Primer Homology"
BASE COUNT      89 a      46 c      55 g      60 t
ORIGIN
      1 agcttgatt gtgagaataa tgaagcgaa aagaatctg ccacatacaa cattgggtcaa
      61 cgaatgcatt gcgcaatcac accaaagggtt caatgcaaag gtttctatgg tcaagagagc
      121 catcgatagc ttaatacaaa agggatacct acagagggga gacgatggtg aatcgtatgc
      181 ttaccttgct taatcatctt tgaaggcttg tgctgatcga acgaagcaaa tcctacgagt
      241 aaatacataa
//

LOCUS      500bp Spacer 500 bp      DNA      LINEAR      SYN
DEFINITION      Spacer
ACCESSION      pKLi060
FEATURES
      Location/Qualifiers
      misc_feature      1..500
                          /note="500bp Spacer"
      primer_bind      1..20
                          /note="Fw. Primer Homology"
      primer_bind      complement (481..500)
                          /note="Rev. Primer Homology"
BASE COUNT      163 a      82 c      109 g      146 t
ORIGIN
      1 agcttgatt gtgagaataa tgaagcgaa aagaatctg ccacatacaa cattgggtcaa

```

61 cgaatgcatt gcgcaatcac accaaagggt caatgcaaag gtttctatgg tcaagagagc  
121 catcgatagc ttaatacaaa agggatacct acagagggga gacgatgggt aatcgtatgc  
181 ttaccttgct taatcatctt tgaaggcttg tgctgatcga acgaagcaaa tcctacgagt  
241 aaatacataa gcgtatacat atatatatat atatatatat atatatatat atgtatatat  
301 atatatgtgt gtgtgtgtaa ttgtgtgtat tcaactgaac tatgaagagt ctttgacctc  
361 ttgagaatct catagtatga agatatggca cttctctttc cgttgtaaca tcctttaccg  
421 ggcggtcttt cggcctgctt gagaagagat caggctgaaa tgatgagact gacaacaagg  
481 atcagtcagt ggcagagttg

//

## DNA sequence and annotation of circuit constructs

LOCUS pKDL071 5797 bp DNA CIRCULAR SYN  
 DEFINITION Lac/Tet pTrc2 Monocistronic Toggle  
 ACCESSION pKDL071  
 FEATURES Location/Qualifiers  
     misc\_feature complement (4849..1)  
         /note="KanR"  
     CDS complement (55..771)  
         /note="GFPmut3b"  
     misc\_feature complement (772..822)  
         /note="rbsKDL025"  
     misc\_feature complement (823..896)  
         /note="PLtet0"  
     CDS complement (939..2021)  
         /note="lacI"  
     misc\_feature complement (2022..2051)  
         /note="rbsKDL026"  
     misc\_feature complement (2058..2131)  
         /note="PLtet0"  
     misc\_feature 2150..2224  
         /note="Ptrc-2"  
     misc\_feature 2231..2262  
         /note="rbsKDL028-SDM"  
     CDS 2263..2886  
         /note="tetR"  
     misc\_feature 2929..3003  
         /note="Ptrc-2"  
     misc\_feature 3010..3045  
         /note="rbsKDL027"  
     CDS 3046..3756  
         /note="mCherry"  
     misc\_feature 3811..3915  
         /note="T1"  
         /product="transcriptional terminator from rrnB operon"  
     misc\_feature 3922..4729  
         /note="ColE1"  
         /product="High Copy Origin of Replication"  
     misc\_feature 4736..4841  
         /note="T0"  
         /product="transcriptional terminator from phage lambda"  
     CDS complement (4867..5661)  
         /note="KanR"  
 BASE COUNT 1415 a 1530 c 1491 g 1361 t  
 ORIGIN  
     1 gacgtctgtg caagtactac tgttctgcag tcacttgaat tcgatacca gctgttattt  
     61 gtatagttca tccatgccat gtgtaatccc agcagcggtt acaaactcaa gaaggaccat  
     121 gtggctctc ttttcggtgg gatctttcga aagggcagat tgtgtggaca ggtaatggtt  
     181 gtctggtaaa aggacagggc catcgccaat cggagtattt tgttgataat ggtctgctag  
     241 ttgaacgctt ccatcttcaa tgttgtgtct aattttgaag ttaactttga ttccattctt  
     301 ttgtttgtct gccatgatgt atacattgtg tgagttatag ttgtattcca atttgtgtcc  
     361 aagaatgttt ccatcttctt taaaatcaat accttttaac tcgattctat taacaagggt  
     421 atcaccttca aacttgactt cagcacgtgt cttgtagttc ccgtcatctt tgaaaaatat

481 agttctttcc tgtacgtaac cttcgggcat ggcactcttg aaaaagtcac gctgtttcat  
541 gtgatctggg tatctcgsaa agcattgaac accataaccg aaagtagtga caagtgttgg  
601 ccacggaaca ggtagttttc cagtagtgca aataaattta agggtaagtt ttccgtatgt  
661 tgcacacact tcaccctctc cactgacaga aaatttgtgc ccattaacat caccatctaa  
721 ttcaacaaga attgggacaa ctccagtga aagttcttct cttttacgca tgtgactac  
781 ctcttgggtt gtctatgcta tgctgatcta caactggcat gcggtcagtg cgtcctgctg  
841 atgtgctcag tatctctatc actgataggg atgtcaatct ctatcactga tagggaaacg  
901 tttcgcagaa gcttccgsaa ggtaccactt tgccgcggtc actgcccgct ttccagtcgg  
961 gaaacctgtc gtgccagttg cattaatgaa tcggccaacg cgcggggaga ggcggtttgc  
1021 gtattgggag ccagggtggt ttttctttc accagtgaga cgggcaacag ttgattgcc  
1081 ttcaccgcct ggccctgaga gagttgcagc aagcggcca cgctggtttg cccagcagg  
1141 cgaaaatcct gtttgatggt ggtaacggc gggatataac atgagctgtc ttcggtatcg  
1201 tcgtatcca ctaccgagat gtccgcacca acgcgagcc cggactcggg aatggcgcg  
1261 attgccccca gcgccatctg atcgttggca accagcatcg cagtgggaa gatgccctca  
1321 ttcagcattt gcatggtttg ttgaaaaccg gacatggcac tccagtcgcc tcccgttcc  
1381 gctatcggct gaatttgatt gcgagtgaga tatttatgcc agccagccag acgcagacgc  
1441 gccgagacag aacttaatgg gcccgctaac agcgcgattt gctggtgacc caatgcgacc  
1501 agatgctcca cccccagtcg cgtaccgtct tcatgggaga aaataaact gttgatgggt  
1561 gtctggtcag agacatcaag aaataacgcc ggaacattag tgcaggcagc ttccacagca  
1621 atggcatcct ggtcatccag cggatagtta atgatcagcc cactgacgcg ctgcgcgaga  
1681 agattgtgaa ccgccgctt acaggcttcg acgccgctt gttctaccat cgacaccacc  
1741 acgctggcac ccagttgatc ggcgcgagat ttaatcgccg cgacaatttg cgacggcgcg  
1801 tgcagggcca gactggaggt ggcaacgsca atcagcaacg actgtttgcc cgccagttgt  
1861 tgtgccacgc ggttgggaat gtaattcagc tccgccatcg ccgcttccac tttttccgc  
1921 gttttcgsag aaacgtggct ggccctggtt accacgcggg aaacggctcg ataagagaca  
1981 ccggcatact ctgcgacatc gtacagcggt actggtttca ttgtacacc tctcttata  
2041 ttgggaccta tggatccggt cagtgcgtcc tgctgatgtg ctcagtatct ctactatga  
2101 tagggatgtc aatctctatc actgataggg acggccgccc gttccatggc tgaatgagc  
2161 tgttgacaat taatcatccg gctcgtataa tgtgtggaat tgtgagcgga taacaatttc  
2221 acacgtagc cgccttcggc gaagctaggg acgagagcta gcatgtctcg ttagataaa  
2281 agtaaagtga ttaacagcgc attagagctg cttaatgagg tcggaatcga aggttaaca  
2341 acccgtaaac tcgcccagaa gctaggtgta gagcagccta cattgtattg gcatgtaaaa  
2401 aataagcggg ctttgctcga cgccttagcc attgagatgt tagataggca ccatactcac  
2461 ttttgccctt tagaagggga aagctggcaa gattttttac gtaataacgc taaaagtttt  
2521 agatgtgctt tactaagtca tcgcatgga gcaaaagtac atttaggtag acggcctaca  
2581 gaaaaacagt atgaaactct cgaaaatcaa ttagcctttt tatgccaaca aggtttttca  
2641 ctagagaatg cattatatgc actcagcgtc gtggggcatt ttactttagg ttgctattg  
2701 gaagatcaag agcatcaagt cgctaaagaa gaaagggaaa cacctactac tgatagtatg  
2761 ccgccattat tacgacaagc tatcgaatta tttgatcacc aagggtcgaga gccagccttc  
2821 ttattcggcc ttgaattgat catctgcgga ttagaaaaac aacttaaatg tgaaagtggg  
2881 tcttgagagc tcggactgct taagtgcctc catatgctcg ttcccgggct gaaatgagct  
2941 gttgacaatt aatcatccgg ctctgataat gtgtggaatt gtgagcggat aacaatttca  
3001 caccaattga gtattaacta tcggttcaact gatagggagg cgcgatggt gagcaagggc  
3061 gaggaggata acatggccat catcaaggag ttcatgcgct tcaaggttca catggagggc  
3121 tccgtgaacg gccacgagtt cgagatcgag ggcgagggcg agggccgccc ctacgagggc  
3181 acccagaccg ccaagctgaa ggtgaccaag ggtggcccc tgcccttcgc ctgggacatc  
3241 ctgtcccctc agttcatgta cggctccaag gcctacgtga agcaccgcc cgacatcccc  
3301 gactacttga agctgtcctt ccccagggc ttcaagtggg agcgcgtgat gaacttcgag  
3361 gacggcggcg tggtagaccg gaccaggac tcctccctgc aagacggcga gttcatctac  
3421 aagggtgaagc tgcgcgccac caacttccc tccgacggcc ccgtaatgca gaagaagact  
3481 atgggctggg aggcctctc cgagcggatg taccggagg acggcgcgct gaagggcgag  
3541 atcaagcaga ggctgaagct gaaggacggc ggccactacg acgctgaggt caagaccacc  
3601 tacaaggcca agaagcccgt gcaactgccc ggcgctaca acgtcaacat caagttggac  
3661 atcacctccc acaacgagga ctacaccatc gtggaacagt acgaacgcg cgagggccgc  
3721 cactccaccg cgggcatgga cgagctgtat aagtaagata tctatcgccc tagggaccgt



```

3781 ctcgagagaa tcaatattaa tccaacgcgt ggcatcaaat aaaacgaaag gctcagtcga
3841 aagactgggc ctttcgtttt atctgtttgt tgtcggtgaa cgctctcctg agtaggacaa
3901 atccgccgcc ctagacttag gcgttcggct gcggcgagcg gtatcagctc actcaaaggc
3961 ggtaatacgg ttatccacag aatcagggga taacgcagga aagaacatgt gagcaaaagg
4021 ccagcaaaag gccaggaacc gtaaaaaggc cgcgttgctg gcgtttttcc ataggctccg
4081 cccccctgac gagcatcaca aaaatcgacg ctcaagttag aggtggcgaa acccgacagg
4141 actataaaga taccaggcgt ttccccctgg aagctccctc gtgcgctctc ctgttccgac
4201 cctgccgctt accggatacc tgtccgcctt tctcccttcg ggaagcgtgg cgcttttctca
4261 tagctcacgc tgtaggtatc tcagtccggt gtaggtcgtt cgctccaagc tgggctgtct
4321 gcacgaacc cccgttcagc ccgaccgctg cgccttatcc ggtaactatc gtcttgagtc
4381 caaccggta agacacgact tatcgccact ggacgagcc actggtaaca ggattagcag
4441 agcgaggtat gtaggcggtg ctacagagtt cttgaagtgg tggcctaact acggctacac
4501 tagaaggaca gtatttggtg tctgcgctct gctgaagcca gttaccttcg gaaaaagagt
4561 tggtagctct tgatccggca aacaaaccac cgctggtagc ggtggttttt ttgtttgcaa
4621 gcagcagatt acgcgagaa aaaaaggatc tcaagaagat cctttgatct tttctacggg
4681 gtctgacgct cagtggaacg aaaactcacg ttaagggatt ttggtcatgg ctagtgcctg
4741 gattctcacc aataaaaaac gccggcgggc aaccgagcgt tctgaacaaa tccagatgga
4801 gttctgaggt cactactgga tctatcaaca ggagtccaag ccaattctcg aaccccagag
4861 tcccgcctag aagaactcgt caagaaggcg atagaaggcg atgcgctgcg aatcgggagc
4921 ggcgataccg taaagcacga ggaagcggtc agcccattcg ccgccaagct cttcagcaat
4981 atcacgggta gccaacgcta tgtcctgata gcggtccgcc acaccagcc ggccacagtc
5041 gatgaatcca gaaaagcggc cttttccac catgatattc ggcaagcagg catcgcctg
5101 ggtcacgacg agatcctcgc cgtcgggcat acgcgcttg agcctggcga acagttcggc
5161 tggcgcgagc ccctgatgct cttcgtccag atcatcctga tcgacaagac cggcttccat
5221 ccgagtacgt gctcgcctga tgcgatggtt cgcttggtgg tcgaatgggc aggtagccgg
5281 atcaagcgtg tgcagccgcc gcattgcatc agccatgatg gatactttct cggcaggagc
5341 aaggtgagat gacaggagat cctgccccgg cacttcgccc aatagcagcc agtcccctcc
5401 cgcttcagtg acaacgtcga gcacagccgc gcaaggaacg cccgtcgtgg ccagccacga
5461 tagccgcgct gcctcgtctt gcagttcatt cagggcaccg gacaggtcgg tcttgacaaa
5521 aagaaccggg cgaccctgcg ctgacagccg gaacacggcg gcatcagagc agccgattgt
5581 ctgttggtcc cagtcatagc cgaatagcct ctccaccaa gccgccggag aacctgcgtg
5641 caatccatct tgttcaatca tgcgaaacga tcctcatcct gtctcttgat cagatcttga
5701 tcccctgcmc catcagatcc ttggcggcaa gaaagccatc cagtttactt tgcagggctt
5761 cccaacctta ccagagggcg gcccaactgg caattcc

```

//

```

LOCUS      pKDL106      7687 bp      DNA      CIRCULAR SYN
DEFINITION 3FFL
ACCESSION  pKDL106
FEATURES
misc_feature complement (6799..1)
            /note="KanR"
CDS        complement (55..771)
            /note="GFPmut3b"
misc_feature complement (772..822)
            /note="rbsKDL025"
misc_feature complement (823..896)
            /note="PLtet0"
CDS        complement (939..2021)
            /note="lacI"
misc_feature complement (2022..2051)
            /note="rbsKDL026"
misc_feature complement (2058..2131)
            /note="PLtet0"

```

misc\_feature 2150..2692  
 /note="PmgrB"  
 misc\_feature 2699..2726  
 /note="rbsKDL032d"  
 CDS 2727..3350  
 /note="tetR"  
 CDS 3394..4272  
 /note="AraC\_LAA\_Keasling"  
 misc\_feature 4279..4401  
 /note="T0"  
 misc\_feature 4293..4387  
 /note="T0"  
 misc\_feature 4408..4893  
 /note="Plac/ara"  
 misc\_feature 4900..4935  
 /note="rbsKDL027"  
 CDS 4936..5646  
 /note="mCherry"  
 misc\_feature 5701..5805  
 /note="T1"  
 /product="transcriptional terminator from rrnB operon"  
 misc\_feature 5812..6619  
 /note="ColE1"  
 /product="High Copy Origin of Replication"  
 misc\_feature 6626..6731  
 /note="T0"  
 /product="transcriptional terminator from phage lambda"  
 CDS complement (6757..7551)  
 /note="KanR"

BASE COUNT 1928 a 1971 c 1955 g 1833 t  
 ORIGIN

```

1  gacgtctgtg caagtactac tgttctgcag tcacttgaat tcgataccca gctgttattt
61  gtatagttca tccatgccat gtgtaatccc agcagcgggt acaaactcaa gaaggaccat
121 gtggtctctc ttttcgttgg gatctttcga aagggcagat tgtgtggaca ggtaatgggt
181 gtctggtaaa aggacagggc catcgccaat cggagtattt tgttgataat ggtctgctag
241 ttgaacgctt ccatcttcaa tgttgtgtct aattttgaag ttaactttga ttccattctt
301 ttgtttgtct gccatgatgt atacattgtg tgagttatag ttgtattcca atttgtgtcc
361 aagaatgttt ccatcttctt taaaatcaat accttttaac tcgattctat taacaagggt
421 atcaccttca aacttgactt cagcacgtgt cttgtagttc cgtcatctt tgaaaaatat
481 agttctttcc tgtacgtaac cttcgggcat ggcaactctt aaaaagtcac gctgtttcat
541 gtgatctggg tatctcgcaa agcattgaac accataaccg aaagtagtga caagtgttgg
601 ccacggaaca ggtagttttc cagtagtgca aataaattta agggtaagtt ttccgtatgt
661 tgcatacctt tcaccctctc cactgacaga aaatttgtgc ccattaacat caccatctaa
721 ttcaacaaga attgggacaa ctccagtga aagttcttct cctttacgca tgtgcactac
781 ctctttggtt gtctatgcta tgctgatcta caactggcat gcggtcagtg cgtcctgctg
841 atgtgctcag tatctctatc actgataggg atgtcaatct ctatcactga tagggaaacg
901 tttcgagaaa gcttccgcaa ggtaccactt tgccgcggtc actgcccgct ttccagtcgg
961 gaaacctgtc gtgccagttg cattaatgaa tcggccaacg cgcggggaga ggcggtttgc
1021 gtattgggag ccagggtggt ttttctttc accagtgaga cgggcaacag ttgattgcc
1081 ttcaccgcct ggccctgaga gagttgcagc aagcgggtca cgctggtttg cccagcagg
1141 cgaaaatcct gtttgatggt ggtaacggc gggatataac atgagctgtc ttcggtatcg
1201 tcgtatcca ctaccgagat gtccgcacca acgagcagcc cggactcggg aatggcgcg
1261 attgccccca ggcctatctg atcgttggca accagcatcg cagtgggaac gatgccctca
1321 ttcagcattt gcatggtttg ttgaaaaccg gacatggcac tccagtcgcc tcccgttcc
1381 gctatcggct gaatttgatt gcgagtgaga tatttatgcc agccagccag acgcagacgc
  
```

1441 gccgagacag aacttaatgg gcccgctaac agcgcgattt gctggtgacc caatgcgacc  
1501 agatgctcca cgcccagtcg cgtaccgtct tcatgggaga aaataatact gttgatgggt  
1561 gtctggtcag agacatcaag aaataacgcc ggaacattag tgcaggcagc ttccacagca  
1621 atggcatcct ggtcatccag cggatagtta atgatcagcc cactgacgcg ctgcgcgaga  
1681 agattgtgaa ccgccgcttt acaggcttcg acgccgcttc gttctacat cgacaccacc  
1741 acgctggcac ccagttgatc ggcgcgagat ttaatcgccg cgacaatttg cgacggcgcg  
1801 tgcagggcca gactggaggt ggcaacgcca atcagcaacg actgtttgcc cgccagttgt  
1861 tgtgccacgc ggttgggaat gtaattcagc tccgccatcg ccgcttcac tttttcccgc  
1921 gttttcgcag aaacgtggct ggccctggttc accacgcggg aaacggctcg ataagagaca  
1981 ccggcatact ctgcgacatc gtacagcgtt actggtttca ttgtacacc tctccttata  
2041 ttgggacctt tggatccggt cagtgcgtcc tgctgatgtg ctcatctct ctatcactga  
2101 tagggatgtc aatctctatc actgataggg acggccgccc gttccatggg atgagagtaa  
2161 gaacctgtcg gaatatcaaa cagacaggtt ctttatttag catgagaaaa ataaagtga  
2221 aggtggcgtt atattaaacg cgcttgctat aagagtattt tactcaggag tgagaatctg  
2281 gttattttatt gcccttaacc attatcgacc acgatattgc ttttgcgtaa cagcgggcaa  
2341 tctgttatcc ccaaaaaacc acttttagtg tgcaagtatt gtaccgtgct ggtgcctctg  
2401 gcagtcagat aggtacattg caaacctaact cctgcggcat tctctttgct tccaatcaaa  
2461 acgccatact cgctgagtaa taatcctatc cataccagtg ctatcagcat aactgtgcga  
2521 atgatgaatc gcattacaac ctcttctctt tttatgttcg cttaatcgta cgggcaatat  
2581 gcgctgaagc aagcgactca ttccgaaaaa gcacgaatat cgacatagtt aggcgctgtt  
2641 taactaacc atgctagttt aatgacataa ggtaggtgaa acggagattg gagtcgaccg  
2701 cataggagac aataagaggg gctagcatgt ctctgtttaga taaaagtaaa gtgattaaca  
2761 gcgcattaga gctgcttaat gaggtcggaa tcgaaggttt aacaaccctg aaactcggcc  
2821 agaagctagg tgtagagcag cctacattgt attggcatgt aaaaaataag cgggctttgc  
2881 tcgacgcctt agccattgag atgttagata ggcaccatac tcacttttgc ctttagaag  
2941 gggaaagctg gcaagatttt ttacgtaata acgctaaaag ttttagatgt gctttactaa  
3001 gtcattgcga tggagcaaaa gtacatttag gtacacggcc tacagaaaaa cagtatgaaa  
3061 ctctcgaaaa tcaattagcc tttttatgcc aacaaggttt ttcactagag aatgcattat  
3121 atgcactcag cgctgtgggg cattttactt taggttgctg attggaagat caagcatc  
3181 aagtcgctaa agaagaaagg gaaacaccta ctactgatag tatgcccca ttattacgac  
3241 aagctatcga attatttgat caccaagggt cagagccagc cttcttattc ggcttgaat  
3301 tgatcatctg cggattagaa aaacaactta aatgtgaaag tgggtcttga gagctcggac  
3361 tgcttaagat aatataaat aaggacaata atcatggctg aagcgcaaat cgatcccctg  
3421 ctgccgggat actcgtttta cgcccatctg gtggcgggtt taacccgat tgaggccaac  
3481 ggttatctcg atttttttat cgaccgaccg ctgggaatga aaggttatat tctcaatctc  
3541 accattcgcg gtcaggggggt ggtgaaaaat cagggacgag aatttggttg ccgaccgggt  
3601 gatattttgc tgttcccgcc aggagagatt catcactacg gtcgtcatcc ggaggctcgc  
3661 gaatggatc accagtggtt ttactttcgt ccgcgcgcct actggcatga atggcttaac  
3721 tggccgtcaa tctttgcaa tacgggtttc tttcggccgg atgaagcga ccagccgat  
3781 ttcagcgacc tgtttgggca aatcattaac gccgggcaag gggaaaggcg ctattcggag  
3841 ctgctggcga taaatctgct tgagcaactg ttactgcggc gcatgggtgc gattaacgtg  
3901 tcgctccatc caccgatgga taatcgggta cgcgaggctt gtcagtacat cagcgtcac  
3961 ctggcagaca gcaattttga catcgccagc gtcgcacagc atgtttgctt gtcgccgtcg  
4021 cgtctgtcac atcttttccg ccagcagtta gggattagcg tcctgagctg gcgcgaggac  
4081 caacgatta gtcaggcgaa gctgcttttg agcactacc ggatgcctat cgccaccgtc  
4141 ggtcgcaatg ttggttttga cgatcaactc tttttctcgc gattatttaa aaaatgcacc  
4201 ggggccagcc cgagcgagtt tcgtgccggg actagcgcag cgaacgacga aaattacgcc  
4261 gcatcagttt gacatatcg agaattggct tggactcctg ttgatagatc cagtaatgac  
4321 ctcagaactc catctggatt tgttcagaac gctcggttgc cgccgggctg tttttattgg  
4381 tgagaatcca agcagtagtc acccgggaat tgtgagcgga taacaatttc acacaggggc  
4441 ctccggacacc gaggagaatg tcaagaggcg aacacacaac gtcttggagc gccagaggag  
4501 gaacgagcta aaacggagct tttttgccct gcgtgaccag atcccggagt tggaaaaca  
4561 tgaaaaggcc cccaaggtag ttatccttaa aaaagccaca gcatacatcc tgtccgtcca  
4621 agcagaggag caaaagctca tttctgaaga ggacttgttg cggaaacgac gagaacagtt  
4681 gaaacacaaa cttgaacagc tacggaactc ttgtgcgtaa ggaaaagtaa ggaaaacgat

```

4741 tccttctaac agaaatgtcc tgagcaatca cctatgaact gtcgattcga gcatagcatt
4801 tttatccata agattagcgg atcataatct ttacaatfff gagcgtcac aattatgata
4861 gattcagttg tgagcggata acaatffcac acacaattga gtattaacta tcgttcaact
4921 gatagggagg cgccgatggg gagcaagggc gaggaggata acatggccat catcaaggag
4981 ttcatgcgct tcaaggttca catggagggc tccgtgaacg gccacgagtt cgagatcgag
5041 ggcgagggcg agggccgccc ctacgagggc acccagaccg ccaagctgaa ggtgaccaag
5101 ggtggccccc tgcccttcgc ctgggacatc ctgtcccctc agttcatgta cggctccaag
5161 gcctacgtga agcaccgccg cgacatcccc gactacttga agctgtcctt ccccgagggc
5221 ttcaagtggg agcgcgtgat gaacttcgag gacggcggcg tggtgaccgt gaccaggac
5281 tcctccctgc aagacggcga gttcatctac aaggtgaagc tgcgcggcac caacttcccc
5341 tccgacggcc ccgtaatgca gaagaagact atgggctggg aggcctcctc cgagcggatg
5401 taccgccagg acggcgcgct gaagggcgag atcaagcaga ggctgaagct gaaggacggc
5461 ggccactacg acgctgaggt caagaccacc tacaaggcca agaagcccgt gcaactgccc
5521 ggcgcgta ca acgtcaacat caagttggac atcacctccc acaacgagga ctacaccatc
5581 gtggaacagt acgaacgccc cgagggccgc cactccaccg gcggcatgga cgagctgtat
5641 aagtaagata tctatcgccc tagggaccgt ctcgagagaa tcaatattaa tccaacgcgt
5701 ggcatcaaat aaaacgaaag gctcagtcga aagactgggc ctttcgtfff atctgtttgt
5761 tgtcggtgaa cgctctcctg agtaggacaa atccgccgcc ctagacttag gcgttcggct
5821 gcggcgagcg gtatcagctc actcaaaggc ggtaatacgg ttatccacag aatcagggga
5881 taacgcagga aagaacatgt gagcaaaagg ccagcaaaag gccaggaacc gtaaaaaggc
5941 cgcgttgctg gcgtttttcc ataggctccg cccccctgac gagcatcaca aaaatcgacg
6001 ctcaagtcag aggtggcgaa acccgacagg actataaaga taccaggcgt ttccccctgg
6061 aagctccctc gtgcgctctc ctgttccgac cctgccgctt accggatacc tgtccgcctt
6121 tctcccttcg ggaagcgtgg cgcttttctc tagctcacgc tgtaggtatc tcagttcggg
6181 gtaggtcgtt cgctccaagc tgggctgtct gcacgaacc cccgttcagc ccgaccgctg
6241 cgcttatcc ggtaactatc gtcttgagtc caaccgggta agacacgact tatcgccact
6301 ggccagcagc actggttaaca ggattagcag agcgaggat gtaggcggtg ctacagatt
6361 cttgaagtgg tggcctaact acggctacac tagaaggaca gtatttggtg tctcgctctt
6421 cgtaagcca gttaccctcg gaaaaagagt tggtagctct tgatccggca aacaaccac
6481 gctggtatg ggtggttttt ttgtttgcaa gcagcagatt acgcgcagaa aaaaaggatc
6541 tcaagaagat cttttgatct tttctacggg gtctgacgct cagtggaaacg aaaactcacg
6601 ttaagggatt ttggtcatgg ctagtgcctg gattctcacc aataaaaaac gcccgcgggc
6661 aaccgagcgt tctgaacaaa tccagatgga gttctgaggt cactactgga tctatcaaca
6721 ggagtccaag ccaattctcg aaccccagag tcccgcctcag aagaactcgt caagaaggcg
6781 atagaaggcg atgcgctgcg aatcgggagc ggcgataccg taaagcacga ggaagcggtc
6841 agcccattcg ccgccaagct cttcagcaat atcacgggta gccaacgcta tgtcctgata
6901 gcggtccgcc acaccagcc ggccacagtc gatgaatcca gaaaagcggc cattttccac
6961 catgatattc ggcaagcagg catcgcctg ggtaacgac agatcctcgc cgtcgggcat
7021 acgcgccttg agcctggcga acagttcggc tggcgcgagc ccctgatgct cttcgtccag
7081 atcatcctga tcgacaagac cggcttccat ccgagtacgt gctcgtcga tgcgatgttt
7141 cgcttggtgg tcgaatgggc aggtagccgg atcaagcgta tgcagccgcc gcattgcatc
7201 agccatgatg gatactttct cggcaggagc aaggtgagat gacaggagat cctgccccgg
7261 cacttcgccc aatagcagcc agtcccttcc cgcttcagtg acaacgtcga gcacagccgc
7321 gcaaggaacg cccgtcgtgg ccagccacga tagccgcgct gcctcgtctt gcagttcatt
7381 cagggcaccg gacaggtcgg tcttgacaaa aagaaccggg cgaccctgcg ctgacagccg
7441 gaacacggcg gcatcagagc agccgattgt ctgtttgtcc cagtcatagc cgaatagcct
7501 ctccacccaa gccgcccggag aacctgcgtg caatccatct tgttcaatca tgcgaaacga
7561 tcctcatcct gtctcttgat cagatcttga tcccctgcgc catcagatcc ttggcggcaa
7621 gaaagccatc cagtttactt tgcagggcct cccaacctta ccagagggcg gcccaactgg
7681 caattcc

```

//

```

LOCUS      pKDL108      8096 bp      DNA      CIRCULAR SYN
DEFINITION 4FFL
ACCESSION  pKDL108

```

```

FEATURES             Location/Qualifiers
    misc_feature     complement (7208..1)
                    /note="KanR"
    CDS              complement (55..810)
                    /note="LuxR"
    rbs              complement (811..855)
                    /note="rbsKDL025"
    promoter        complement (862..935)
                    /note="PLtet0"
    terminator      complement (942..1172)
                    /note="T1T2"
    CDS              complement (1203..2285)
                    /note="lacI"
    rbs              complement (2286..2315)
                    /note="rbsKDL026"
    misc_feature     complement (2322..2540)
                    /note="Plux"
    misc_feature     2559..3101
                    /note="PmgrB"
    misc_feature     3108..3135
                    /note="rbsKDL032d"
    CDS              3136..3759
                    /note="tetR"
    misc_feature     3778..3802
                    /note="rbs"
    CDS              3803..4681
                    /note="AraC_ASV_Keasling"
    misc_feature     4688..4810
                    /note="T0"
    misc_feature     4702..4796
                    /note="T0"
    misc_feature     4817..5302
                    /note="Plac/ara"
    misc_feature     5309..5344
                    /note="rbsKDL027"
    CDS              5345..6055
                    /note="mCherry"
    misc_feature     6110..6214
                    /note="T1"
                    /product="transcriptional terminator from rrnB operon"
    misc_feature     6221..7028
                    /note="ColE1"
                    /product="High Copy Origin of Replication"
    misc_feature     7035..7140
                    /note="T0"
                    /product="transcriptional terminator from phage lambda"
    CDS              complement (7166..7960)
                    /note="KanR"

```

```

BASE COUNT      2076 a   2026 c   2010 g   1984 t

```

```

ORIGIN

```

```

    1 gacgtctgtg caagtactac tgttctgcag tcacttgaat tcgatacca gctgttatta
   61 atttttaaag tatgggcaat cgattgctcc tgttaaaatt gctttagaaa tactttggca
  121 gcggtttggt gtattgagtt tcatttgcgc attggttaaa tggaaagtga cagtacgctc
  181 actgcaacct aagatTTTTg aaatatccca agagcttttt ctttcgcacg cccacgctaa
  241 acattctttt tctcttttgg ttaaactggt gtttgattta ttatttgcta tttttttt

```

301 tcgataatta tcaactagag aaggaacaat taatggtatg ttcatacacg catgtaaaaa  
361 taaactatct atatagttgt ctttttctga atgtgcaaaa ctaagcattc cgaagccatt  
421 gttagccgta tgaatagggga aactaaacc agtgataaga cctgatgttt tcgcttcttt  
481 aattacattt ggagattttt tatttacagc attgttttca aatatattcc aattaattgg  
541 tgaatgattg gagttagaat aatctactat aggatcatat tttattaaat tagcgtcatc  
601 ataatactgc ctccattttt tagggtaatt atctaggatt gaaatatcag atttaaccat  
661 agaatgagga taaatgatcg cgagtaaata gtattcacia tgtaccattt tagtcatatc  
721 agataagcat tgattaatat cattattgct tctacacgct ttaattttat taattattct  
781 gtatgtgtcg tcggcattta tgtttttcat gtgcactacc tccttggttg tctatgctat  
841 gctgatctac aactggcatg cggtcagtgc gtcctgctga tgtgctcagt atctctatca  
901 ctgatagggga tgtcaatctc tatcactgat agggaaacgt tttttagtaa acgcaaaaag  
961 gccatccgctc aggatggcct tctgcttaat ttgatgcctg gcagtttatg gcgggctcc  
1021 tgcccggcac cctccgggccc gttgcttctgc agcgttcaaa tccgctcccg gcggatttgt  
1081 cctactcagg agagcgttca ccgacaaaaca acagataaaa cgaaaggccc agtctttcga  
1141 ctgagccttt cgttttattt gatgcctcta gcaagcttcc gcaaggtacc actttgccgc  
1201 ggtcactgcc cgctttccag tcgggaaacc tgtcgtgcca gttgcattaa tgaatcggcc  
1261 aacgcgcggg gagaggcggg ttgcgtattg ggagccaggg tggtttttct tttcaccagt  
1321 gagacgggca acagttgatt gcccttcacc gcctggccct gagagagttg cagcaagcgg  
1381 tccacgctgg tttgccccag caggcgaaaa tcctgtttga tggtggttaa cggcgggata  
1441 taacatgagc tgtcttcggg atcgtcgtat cccactaccg agatgtccgc accaacgcgc  
1501 agcccggact cggtaatggc gcgcattgctg cccagcgcca tctgatcgtt ggcaaccagc  
1561 atcgcagtgg gaacgatgcc ctcatcagc atttgcatgg tttgttgaac accggacatg  
1621 gcactccagt gccttcccg ttccgctatc ggctgaattt gattgcgagt gagatattta  
1681 tgccagccag ccagacgcag acgcgccgag acagaactta atgggcccgc taacagcgcg  
1741 atttgctggt gacccaatgc gaccagatgc tccacgcca gtcgcgtacc gtcttcatgg  
1801 gagaaaataa tactgttgat ggggtgtctgg tcagagacat caagaaataa cgcgggaaca  
1861 ttagtgcagg cagcttccac agcaatggca tcttggtcat ccagcggata gttaatgatc  
1921 agcccactga cgcgctgcgc gagaagattg tgaaccgctg ctttacaggc ttcgacgccg  
1981 cttcgttcta ccatcgacac caccacgctg gcacccagtt gatcggcgcg agatttaatc  
2041 ccgcgacaaa tttgcgacgg cgcgtgcagg gccagactgg aggtggcaac gccaatcagc  
2101 aacgactggt tgcccggcag ttgttgtgcc acgcggttgg gaatgtaatt cagctccgcc  
2161 atcgccgctt ccactttttc ccgcgttttc gcagaaacgt ggctggcctg gttcaccacg  
2221 cgggaaacgg tctgataaga gacaccggca tactctgcga catcgtacag cgttactggt  
2281 ttcattgtac accctctcct tatattggga cctatggatc cggtcagtgc gtcctgctga  
2341 tattcgacta taacaaacca ttttcttgcg taaacctgta cgatcctaca ggtgcttatg  
2401 ttaagtaatt gtattcccag cgatacaata gtgtgacaaa aatccaattt attagaatca  
2461 aatgtcaatc cattaccgtt ttaatgatat ataacacgca aaacttgca caaacaatag  
2521 gtaaggataa agagatgggt cggccgcccg ttccatggga tgagagtaag aacctgtcgg  
2581 aatatcaaac agacaggtt tttatttagc atgagaaaaa taaagttgaa ggtggcggtta  
2641 tattaaacgc gcttgctata agagtatttt actcaggagt gagaatctgg ttattttattg  
2701 cccttaacca ttatcgacca cgatattgct tttgcgtaac agcgggcaat ctgttatccc  
2761 caaaaaacca cttttagtgt gcaagtattg taccgtgctg gtgcctctgg cagtcagata  
2821 ggtacattgc aaacctaadc ctgcggcatt ctctttgctt ccaatcaaaa cgccatatcc  
2881 gctgagtaat aatcctatcc ataccagtgc tatcagcata actgtgcgaa tgatgaatcg  
2941 cattacaacc tcttctcttt ttatgttgcg ttaatcgtag cggcaatatg cgctgaagca  
3001 agcgactcat tccgaaaaag cacgaatatc gacatagtta ggcgctgttt aactaaccca  
3061 tgctagttta atgacataag gtaggtgaaa cggagattgg agtcgaccgc ataggagaca  
3121 ataagagggg ctagcatgtc tcgttttagat aaaagtaaag tgattaacag cgcattagag  
3181 ctgcttaatg aggtcggaaat cgaaggttta acaaccgta aactcgcca gaagctaggt  
3241 gtagagcagc ctacattgta ttggcatgta aaaaataagc gggctttgct cgacgcctta  
3301 gccattgaga tgttagatag gcaccatact cacttttgcc ctttagaagg ggaaagctgg  
3361 caagattttt tacgtaataa cgctaaaagt tttagatgtg ctttactaag tcatcgcgat  
3421 ggagcaaaaag tacatntagc tacacggcct acagaaaaac agtatgaaac tctcgaat  
3481 caattagcct ttttatgcca acaaggtttt tcactagaga atgcattata tgcaactcagc  
3541 gctgtggggc attttacttt aggttgcgta ttggaagatc aagagcatca agtcgctaaa

3601 gaagaaaggg aaacacctac tactgatagt atgccgcat tattacgaca agctatcgaa  
3661 ttatttgatc accaaggtgc agagccagcc ttcttattcg gccttgaatt gatcatctgc  
3721 ggattagaaa aacaacttaa atgtgaaagt gggctttgag agctcggact gcttaagata  
3781 aatataaata aggacaataa tcatggctga agcgc aaatc gatcccctgc tgcgggata  
3841 ctcgtttaac gcccattctgg tggcgggttt aacgccgatt gaggccaacg gttatctcga  
3901 tttttttatc gaccgaccgc tgggaatgaa aggttatatt ctcaatctca ccattcgcgg  
3961 tcaggggggtg gtgaaaaatc agggacgaga atttggttgc cgaccgggtg atattttgct  
4021 gttcccgcca ggagagattc atcactacgg tcgtcatccg gaggctcgcg aatggtatca  
4081 ccagtgggtt tactttctgc cgcgcgcta ctggcatgaa tggcttaact ggccgtcaat  
4141 ctttgccaat acgggtttct ttcgcccgga tgaagcgac cagccgcatt tcagcgacct  
4201 gtttgggcaa atcattaacg ccgggcaagg ggaagggcgc tattcggagc tgctggcgat  
4261 aaatctgctt gagcaactgt tactgcggcg catgggtgcg attaactgtt cgctccatcc  
4321 accgatggat aatcgggtac gcgaggcttg tcagtacatc agcgatcacc tggcagacag  
4381 caattttgac atcgccagcg tcgcacagca tgtttgcttg tcgccgtcgc gtctgtcaca  
4441 tcttttccgc cagcagttag ggattagcgt cctgagctgg cgcgaggacc aacgcattag  
4501 tcaggcgaag ctgcttttga gcactaccgg gatgcctatc gccaccgtcg gtcgcaatgt  
4561 tggttttgac gatcaactct atttctcgcg agtattttaa aatgcaccg gggccagccc  
4621 gagcgagttt cgtgccggta ctagcgcagc gaacgacgaa aattacgccg catcagtttg  
4681 acatatgcga gaattggctt ggactcctgt tgatagatcc agtaatgacc tcagaactcc  
4741 atctggattt gttcagaacg ctcggttgcc gccgggctgt ttttattggt gagaatccaa  
4801 gcagtagtca cccgggaatt gtgagcggat aacaatttca cacagggccc tcggacaccg  
4861 aggagaatgt caagaggcga acacacaacg tcttggagcg ccagaggagg aacgagctaa  
4921 aacggagctt ttttgccctg cgtgaccaga tcccggagt ggaaaacaat gaaaaggccc  
4981 ccaagtagt tatccttaa aaagccacag catacatcct gtccgtcaa gcagaggagc  
5041 aaaagctcat ttctgaagag gacttgttgc gaaaacgac agaacagttg aaacacaaac  
5101 ttgaacagct acggaactct tgtgcgtaag gaaaagtaag gaaaacgatt ccttcaaca  
5161 gaaatgtcct gagcaatcac ctatgaactg tcgattcgag catagcattt ttatccataa  
5221 gattagcggg tcaataactt tacaatttg agcgctcaca attatgatat attcagttgt  
5281 gagcggataa caatttcaca cacaattgag tattaactat cgttcaactg atagggaggc  
5341 ccgatgggtg agcaagggcg agggagataa catggccatc atcaaggagt tcatgcgctt  
5401 caaggttac atggagggtc ccgtgaacgg ccacgagttc gagatcgagg gcgaggcgga  
5461 gggccgccc tacgagggca cccagaccgc caagctgaag gtgaccaagg gtggcccct  
5521 gcccttcgcc tgggacatcc tgtcccctca gttcatgtac ggctccaagg cctacgtgaa  
5581 gcaccccgcc gacatccccg actacttgaa gctgtccttc cccgagggtc tcaagtggga  
5641 gcgctgatg aacttcgagg acggcggcgt ggtgaccgtg acccaggact cctccctgca  
5701 agacggcgag ttcattctaca aggtgaagct gcgcgccacc aacttcccct ccgacggccc  
5761 cgtaatgcag aagaagacta tgggctggga ggcctcctc gagcggatgt accccgagga  
5821 cggcgcgctg aaggcgaga tcaagcagag gctgaagctg aaggacggcg gccactacga  
5881 cgctgaggtc aagaccacct acaaggcaa gaagcccgtg caactgcccg gcgctacaa  
5941 cgtcaacatc aagttggaca tcacctcca caacgaggac tacaccatcg tggaacagta  
6001 cgaacgcgcc gagggccgcc actccaccgg cggcatggac gagctgtata agtaagatat  
6061 ctatcgccct agggaccgtc tcgagagaat caatattaat ccaacgcgtg gcatcaata  
6121 aaacgaaagg ctcagtcgaa agactgggcc tttcgtttta tctgttgttt gtcggtgaa  
6181 gctctcctga gtaggacaaa tccgccgcc tagacttagg cgttcggctg cggcgagcgg  
6241 tatcagctca ctcaaaggcg gtaatacggg tatccacaga atcaggggat aacgcaggaa  
6301 agaacatgtg agcaaaaggc cagcaaaagg ccaggaaccg taaaaaggcc gcgttgctgg  
6361 cgttttcca taggctccgc ccccctgac agcatcacia aatcgacgc tcaagtca  
6421 ggtggcgaaa cccgacagga ctataaagat accaggcgtt tccccctgga agctccctcg  
6481 tgcgctctcc tgttccgacc ctgccgctta ccggatacct gtccgccttt ctccctcgg  
6541 gaagcgtggc gctttctcat agctcacgct gtaggtatct cagttcgggt taggtcgttc  
6601 gctccaagct gggctgtctg cacgaacccc ccgttcagcc cgaccgctgc gccttatccg  
6661 gtaactatcg tcttgagtcc aaccggtaa gacacgactt atcgccactg gcagcagcca  
6721 ctggtaacag gattagcaga gcgaggtatg taggcgggtc tacagagttc ttgaagtgg  
6781 ggcctaacta cggctacact agaaggacag tatttgggat ctgcgctctg ctgaagccag  
6841 ttaccttcgg aaaaagagtt ggtagctctt gatccggcaa acaaaccacc gctggtagcg

6901 gtggtttttt tgtttgcaag cagcagatta cgcgcagaaa aaaaggatct caagaagatc  
6961 ctttgatctt ttctacgggg tctgacgctc agtggaaacga aaactcacgt taagggattt  
7021 tggatcatggc tagtgcttgg attctcacca ataaaaaacg cccggcggca accgagcgtt  
7081 ctgaacaaat ccagatggag ttctgaggtc attactggat ctatcaacag gagtccaagc  
7141 caattctcga accccagagt cccgctcaga agaactcgtc aagaaggcga tagaaggcga  
7201 tgcgctgcga atcgggagcg gcgataccgt aaagcacgag gaagcgggtca gccattcgc  
7261 cgccaagctc ttcagcaata tcacgggtag ccaacgctat gtcctgatag cggtcgccca  
7321 caccagccg gccacagtcg atgaatccag aaaagcggcc atttccacc atgatattcg  
7381 gcaagcaggc atcgccgtgg gtcacgacga gatcctcgcc gtcgggcata cgcgccttga  
7441 gcctggcgaa cagttcggct ggcgcgagcc cctgatgctc ttcgtccaga tcatcctgat  
7501 cgacaagacc ggcttccatc cgagtacgtg ctcgctcgat gcgatgtttc gcttggtggt  
7561 cgaatgggca ggtagccgga tcaagcgtat gcagccgccg cattgcatca gccatgatgg  
7621 atactttctc ggcaggagca aggtgagatg acaggagatc ctgccccggc acttcgccca  
7681 atagcagcca gtcccttccc gcttcagtga caacgtcgag cacagccgcg caaggaacgc  
7741 ccgtcgtggc cagccacgat agccgcgctg cctcgtcttg cagttcattc agggcaccgg  
7801 acaggtcggc cttgacaaaa agaaccgggc gaccctgcgc tgacagccgg aacacggcgg  
7861 catcagagca gccgattgtc tgtttgtgcc agtcatagcc gaatagcctc tccaccaag  
7921 ccgccggaga acctgcgtgc aatccatctt gttcaatcat gcgaaacgat cctcatcctg  
7981 tctcttgatc agatcttgat cccctgcgcc atcagatcct tggcggcaag aaagccatcc  
8041 agtttacttt gcagggcttc ccaaccttac cagagggcgg cccaactggc aattcc

//
